# Supplementary material for: Territrem and Butyrolactone Derivatives from a Marine-Derived Fungus Aspergillus Terreus
Source: Mar Drugs. 2014 Dec 17;12(12):6113–24. doi: 10.3390/md12126113 (PMC4278221; doi:10.3390/md12126113)

## Supplementary Information

|                                                                                                  |     |
|--------------------------------------------------------------------------------------------------|-----|
| <b>Figure S1.</b> $^1\text{H}$ NMR spectrum of <b>1</b>                                          | S2  |
| <b>Figure S2.</b> Amplifying $^1\text{H}$ NMR spectrum of <b>1</b>                               | S2  |
| <b>Figure S3.</b> $^{13}\text{C}$ NMR spectrum of <b>1</b>                                       | S3  |
| <b>Figure S4.</b> DEPT135 spectrum of <b>1</b>                                                   | S3  |
| <b>Figure S5.</b> HSQC spectrum of <b>1</b>                                                      | S4  |
| <b>Figure S6.</b> HMBC spectrum of <b>1</b>                                                      | S4  |
| <b>Figure S7.</b> NOESY spectrum of <b>1</b>                                                     | S5  |
| <b>Figure S8.</b> Amplifying NOESY spectrum of <b>1</b>                                          | S5  |
| <b>Figure S9.</b> HRESIMS spectrum of <b>1</b>                                                   | S6  |
| <b>Figure S10.</b> IR spectrum of <b>1</b>                                                       | S6  |
| <b>Figure S11.</b> $^1\text{H}$ NMR spectrum of <b>2</b>                                         | S7  |
| <b>Figure S12.</b> $^{13}\text{C}$ NMR and DEPT135 spectra of <b>2</b>                           | S7  |
| <b>Figure S13.</b> HSQC spectrum of <b>2</b>                                                     | S8  |
| <b>Figure S14.</b> HMBC spectrum of <b>2</b>                                                     | S8  |
| <b>Figure S15.</b> H-H COSY spectrum of <b>2</b>                                                 | S9  |
| <b>Figure S16.</b> NOESY spectrum of <b>2</b>                                                    | S9  |
| <b>Figure S17.</b> HRESIMS spectrum of <b>2</b>                                                  | S10 |
| <b>Figure S18.</b> IR spectrum of <b>2</b>                                                       | S10 |
| <b>Figure S19.</b> $^1\text{H}$ NMR spectrum of <b>3</b>                                         | S11 |
| <b>Figure S20.</b> $^{13}\text{C}$ NMR and DEPT135 spectra of <b>3</b>                           | S11 |
| <b>Figure S21.</b> HSQC spectrum of <b>3</b>                                                     | S12 |
| <b>Figure S22.</b> HMBC spectrum of <b>3</b>                                                     | S12 |
| <b>Figure S23.</b> H-H COSY spectrum of <b>3</b>                                                 | S13 |
| <b>Figure S24.</b> NOESY spectrum of <b>3</b>                                                    | S13 |
| <b>Figure S25.</b> HRESIMS spectrum of <b>3</b>                                                  | S14 |
| <b>Figure S26.</b> IR spectrum of <b>3</b>                                                       | S14 |
| <b>Figure S27.</b> $^1\text{H}$ NMR spectrum of <b>9</b>                                         | S15 |
| <b>Figure S28.</b> $^{13}\text{C}$ NMR spectrum of <b>9</b>                                      | S15 |
| <b>Figure S29.</b> HSQC spectrum of <b>9</b>                                                     | S16 |
| <b>Figure S30.</b> HRESIMS spectrum of <b>9</b>                                                  | S16 |
| <b>Figure S31.</b> IR spectrum of <b>9</b>                                                       | S17 |
| <b>Figure S32.</b> $^1\text{H}$ NMR spectrum of <b>10</b>                                        | S17 |
| <b>Figure S33.</b> $^{13}\text{C}$ NMR and DEPT135 spectra of <b>10</b>                          | S18 |
| <b>Figure S34.</b> HSQC spectrum of <b>10</b>                                                    | S18 |
| <b>Figure S35.</b> HMBC spectrum of <b>10</b>                                                    | S19 |
| <b>Figure S36.</b> H-H COSY spectrum of <b>10</b>                                                | S19 |
| <b>Figure S37.</b> HRESIMS spectrum of <b>10</b>                                                 | S20 |
| <b>Figure S38.</b> IR spectrum of <b>10</b>                                                      | S20 |
| <b>Figure S39.</b> Comparison of the experimental CD spectra of <b>9</b> , <b>11</b> , <b>12</b> | S21 |
| <b>S1.</b> Isolation and purification of compounds <b>1–17</b>                                   | S21 |
| <b>S2.</b> Structures of compounds <b>1–17</b>                                                   | S22 |

Figure S1.  $^1\text{H}$ -NMR spectrum of 1.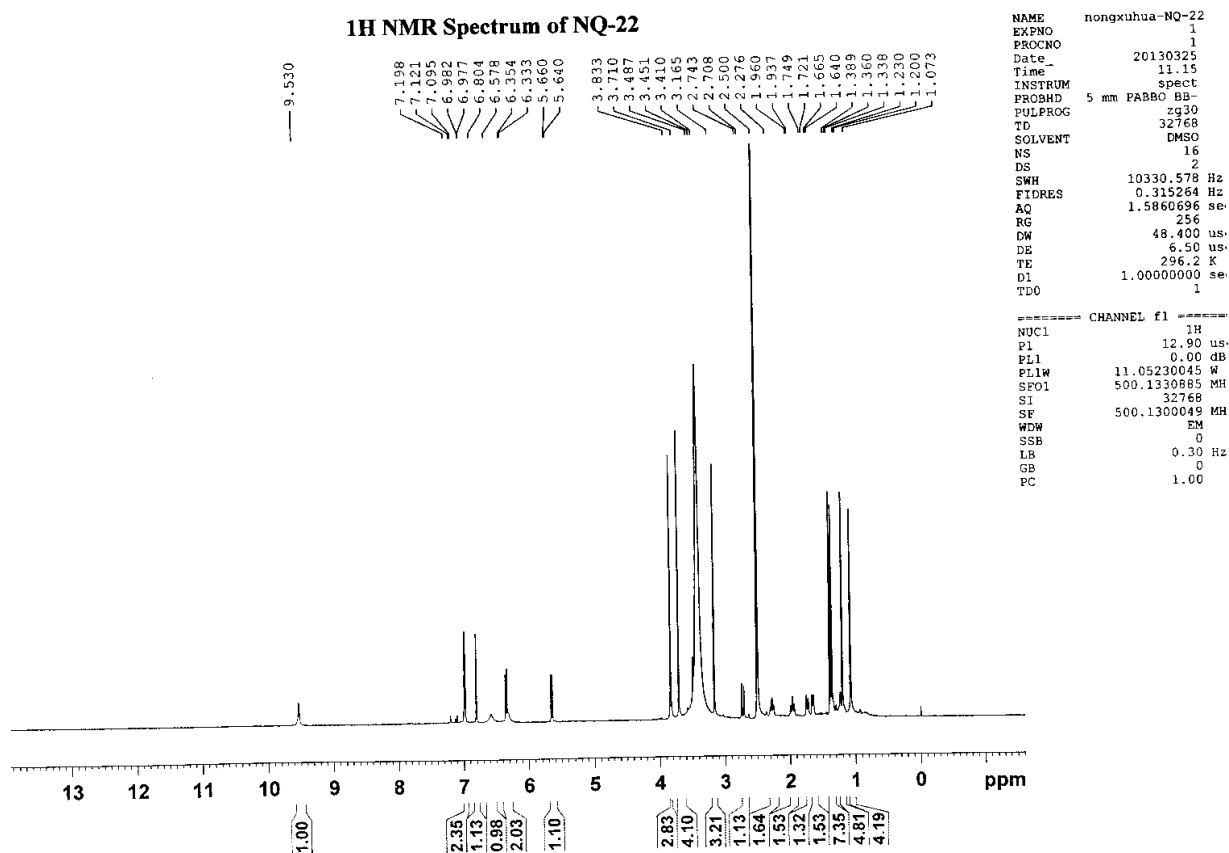Figure S2. Amplifying  $^1\text{H}$ -NMR spectrum of 1.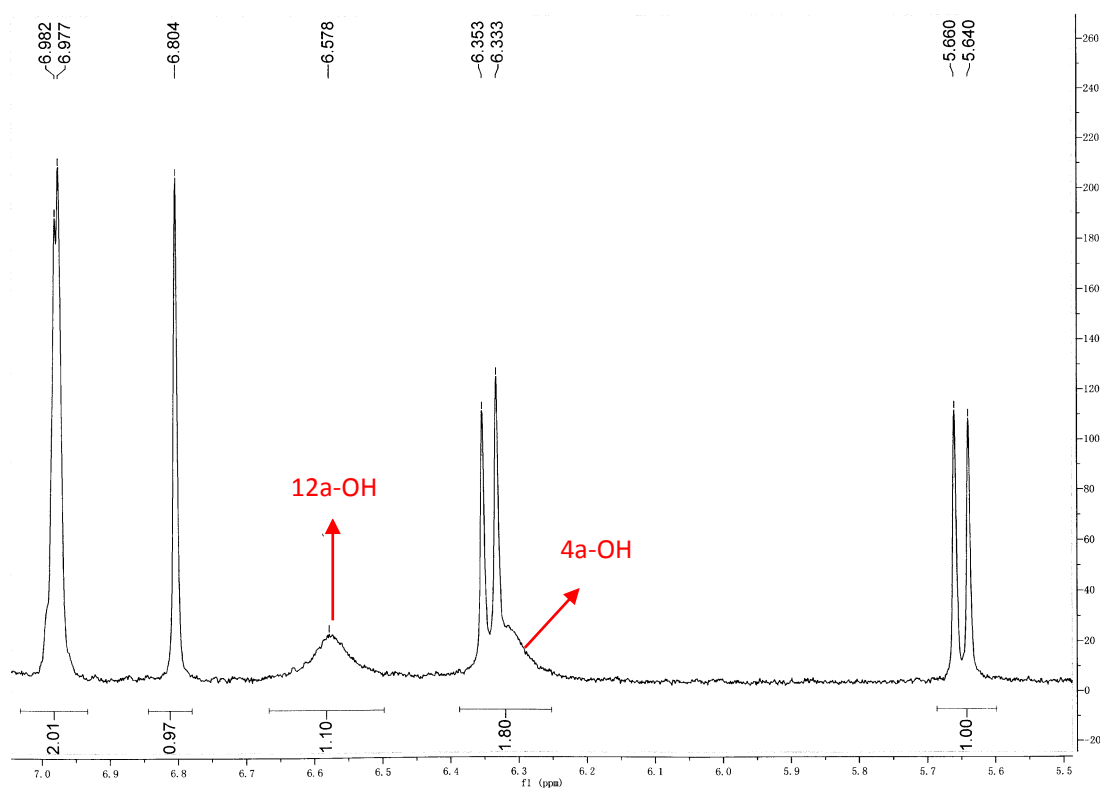

**Figure S3.**  $^{13}\text{C}$ -NMR spectrum of **1**.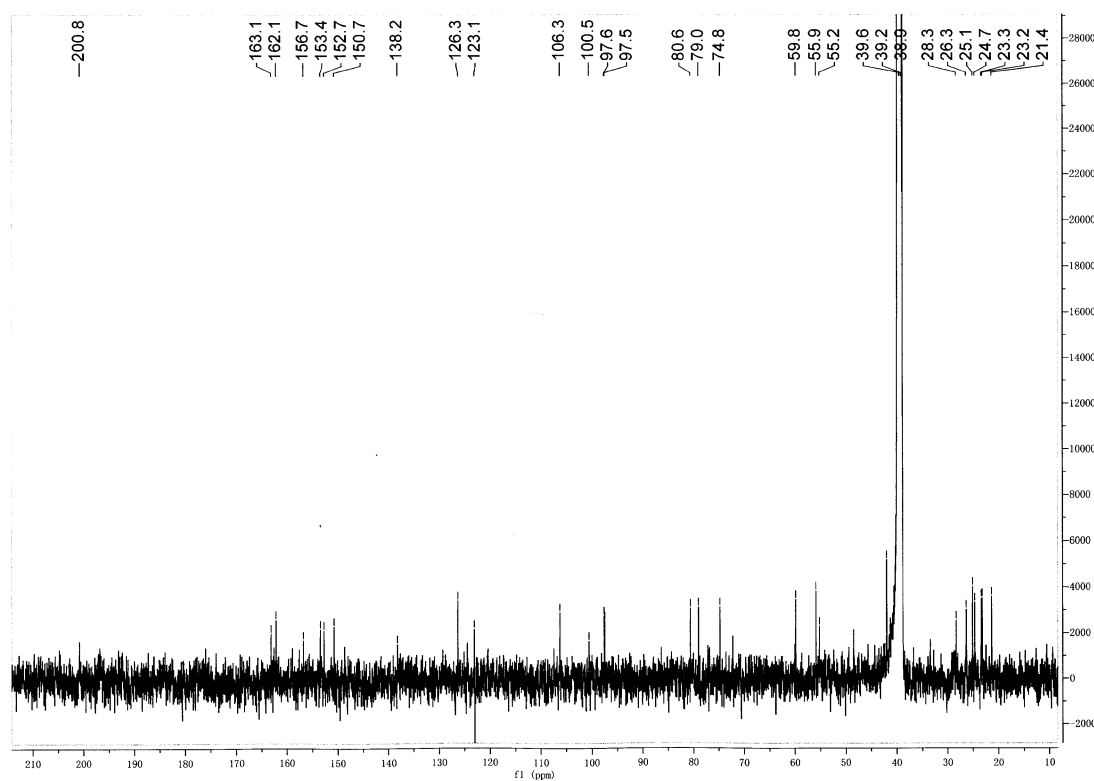**Figure S4.** DEPT135 spectrum of **1**.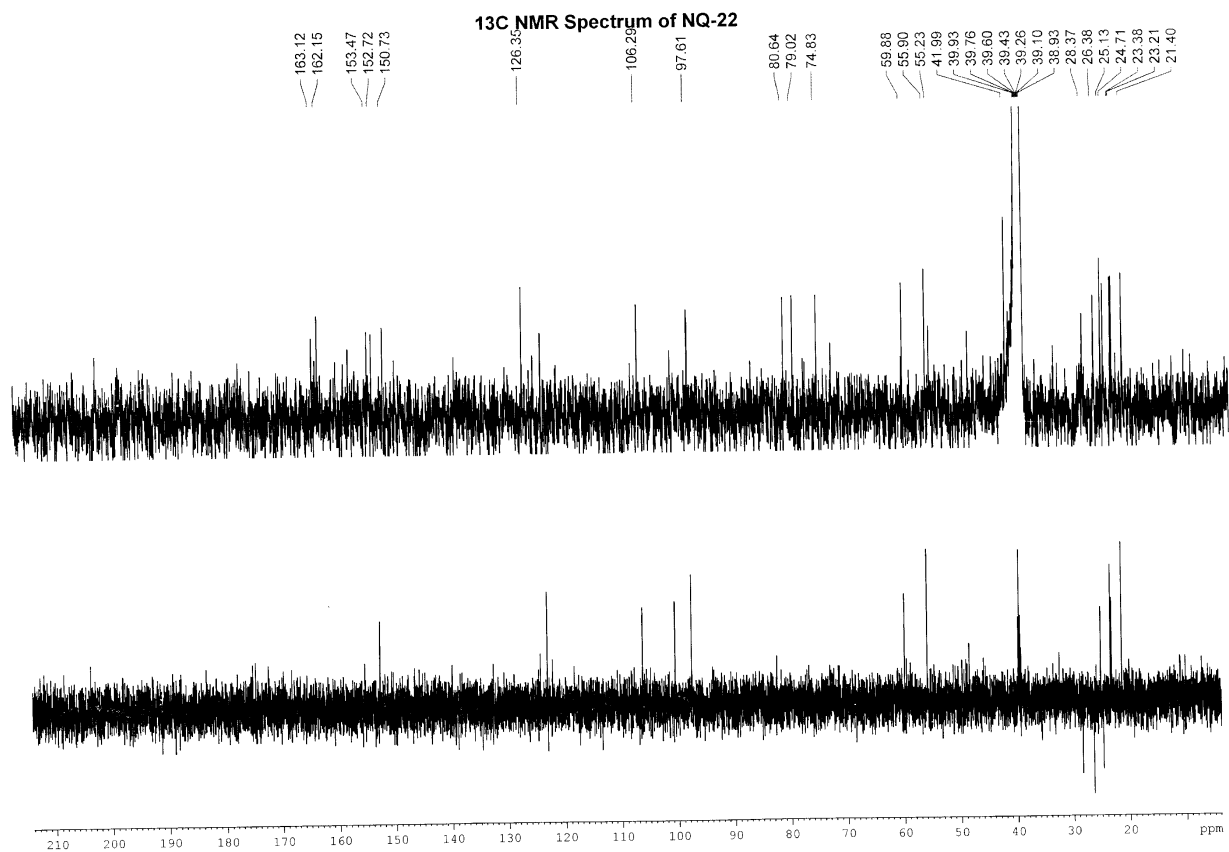

Figure S5. HSQC spectrum of 1.

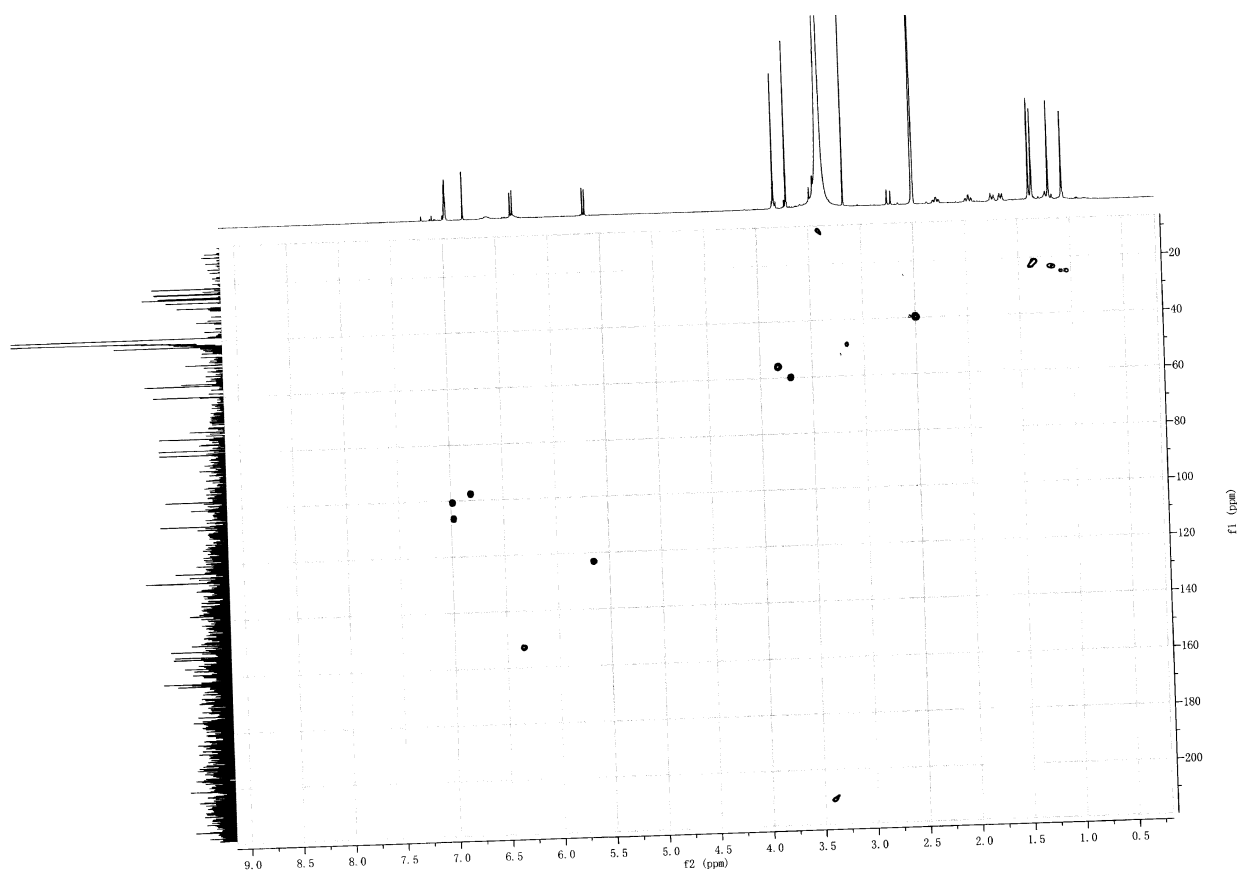

Figure S6. HMBC spectrum of 1.

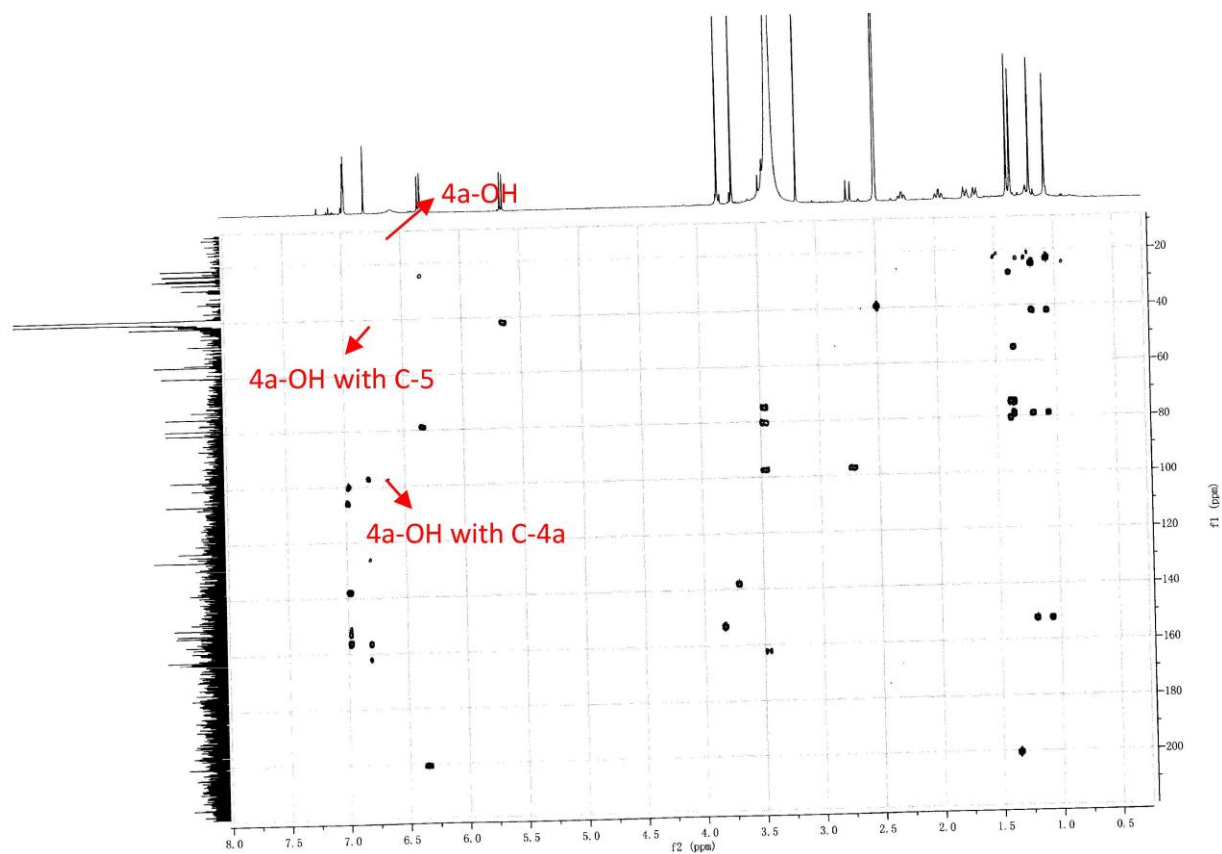

Figure S7. NOE spectrum of 1.

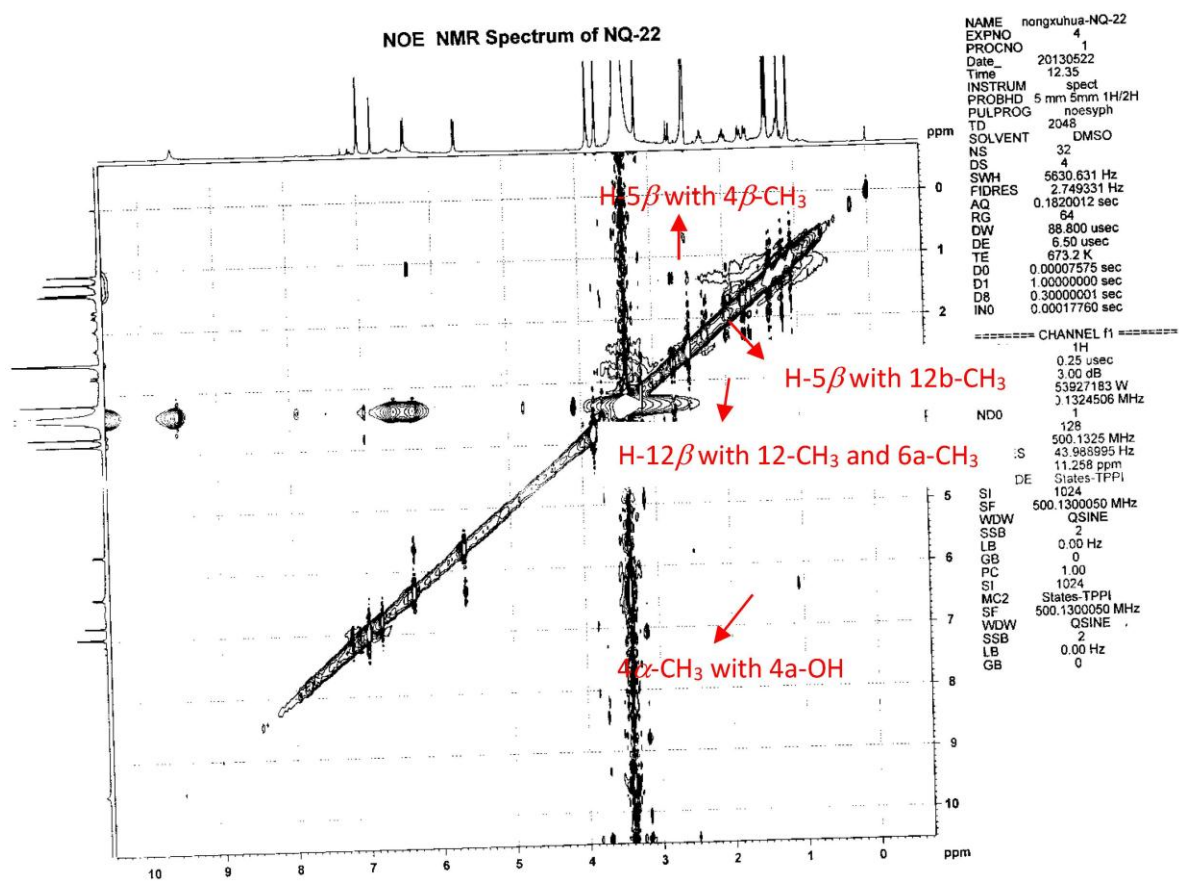

Figure S8. Amplifying NOE spectrum of 1.

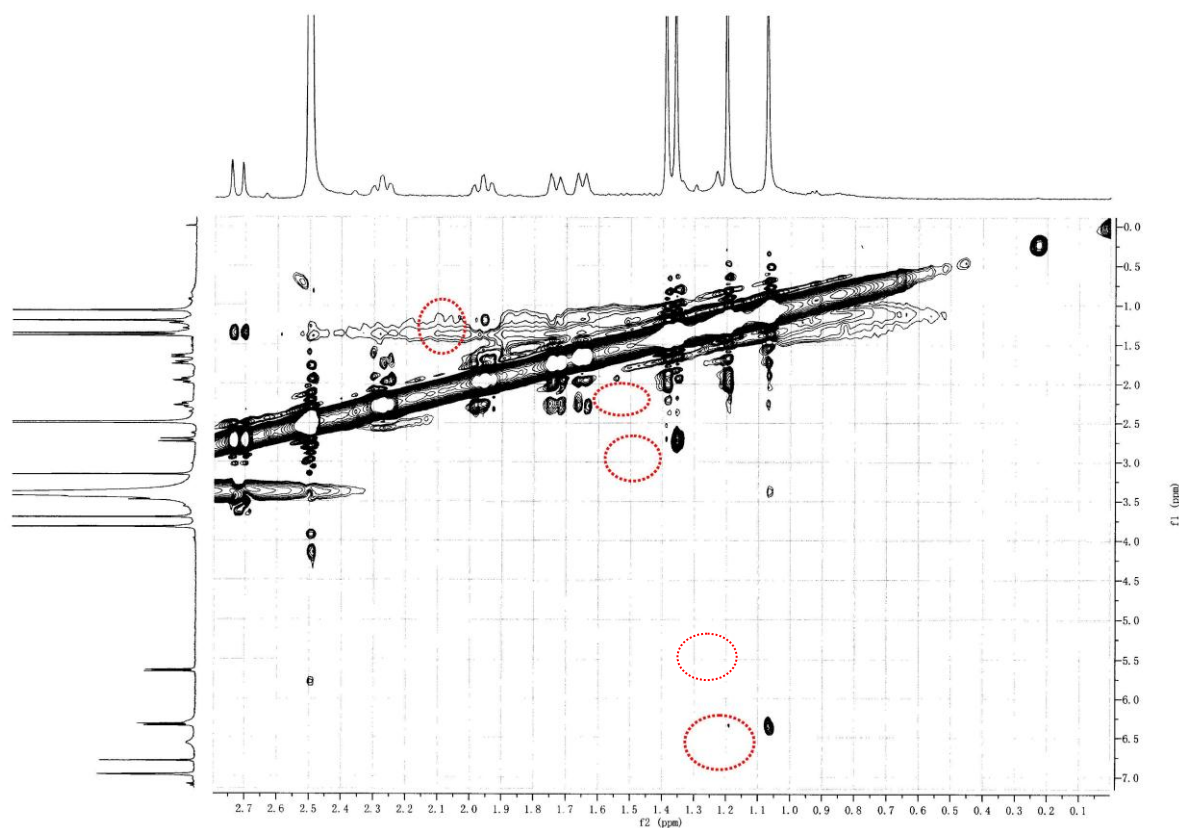

Figure S9. HR-ESIMS spectrum of 1.

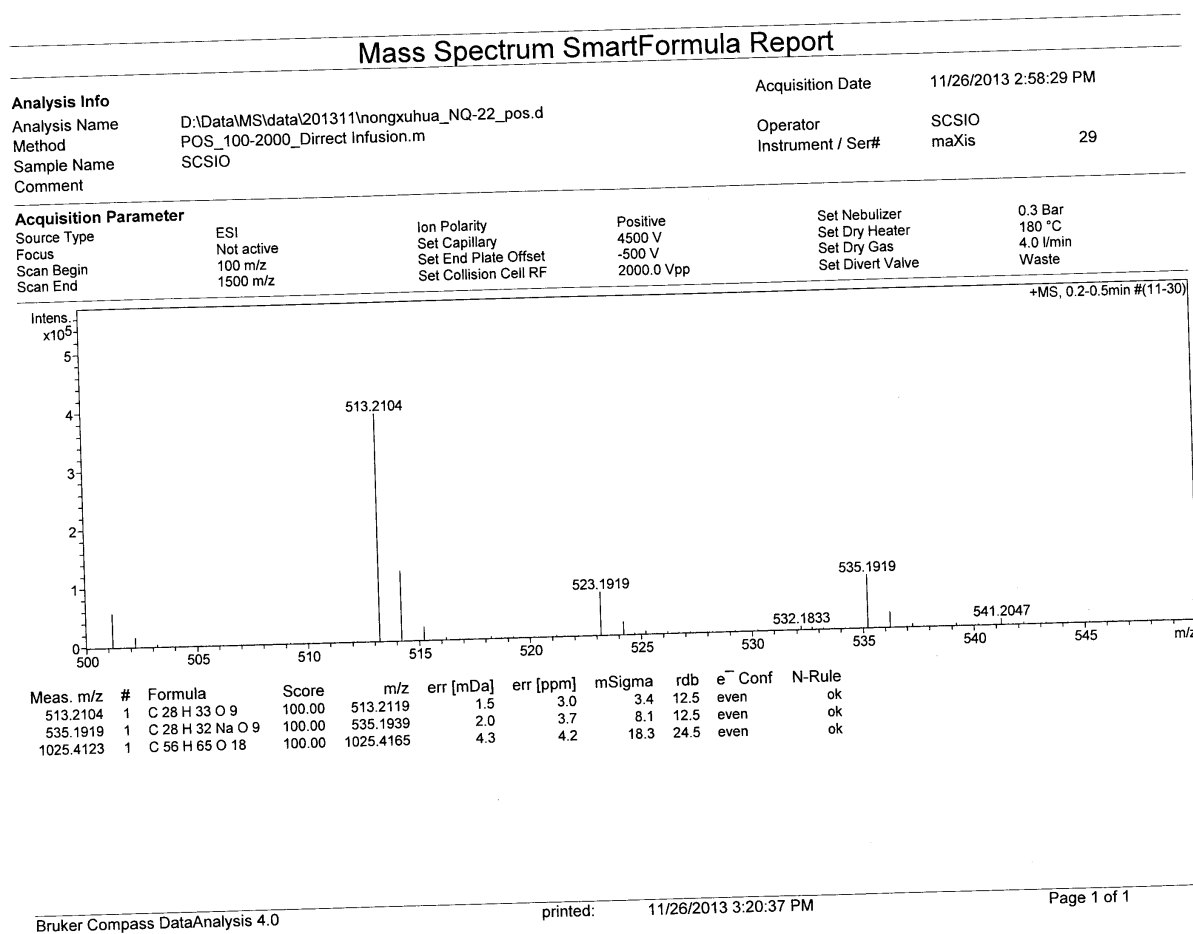

Figure S10. IR spectrum of 1.

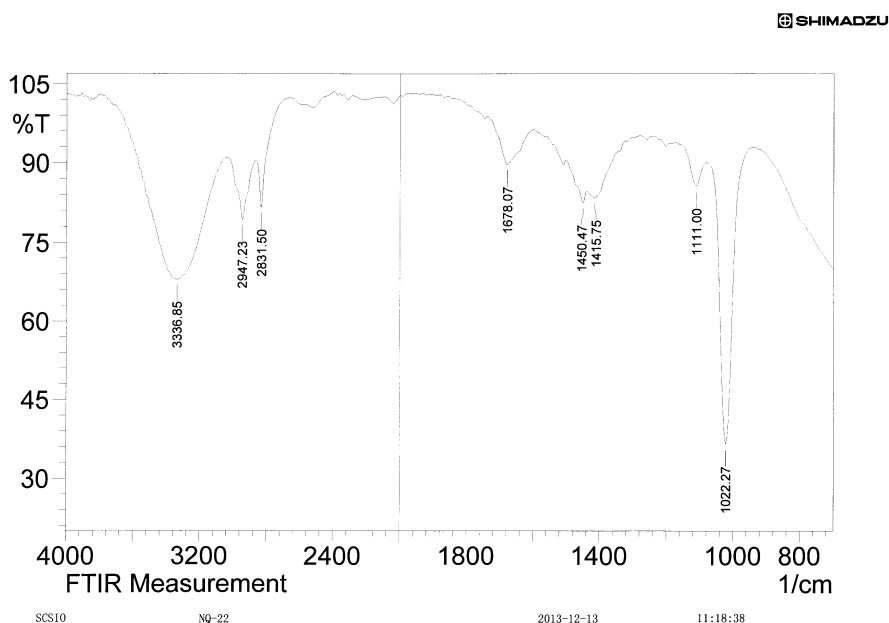

Figure S11.  $^1\text{H}$ -NMR spectrum of 2.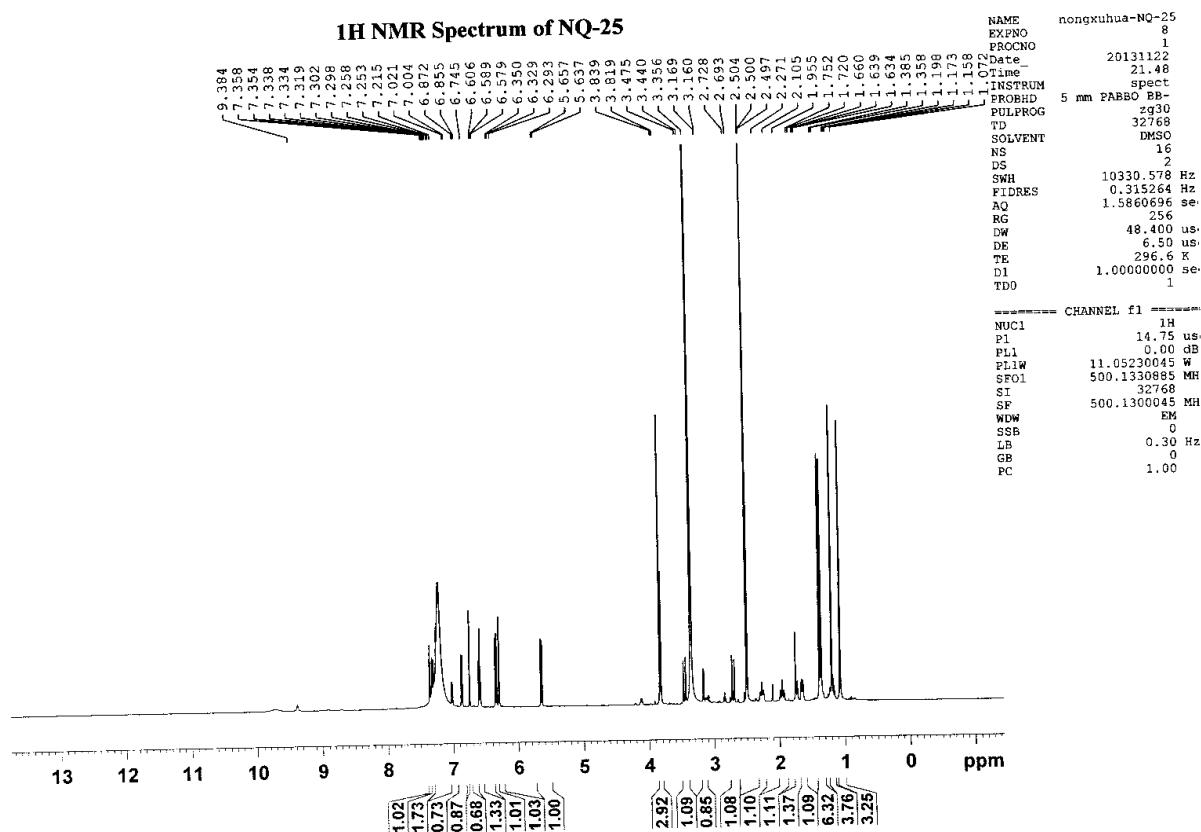Figure S12.  $^{13}\text{C}$ -NMR and DEPT135 spectra of 2.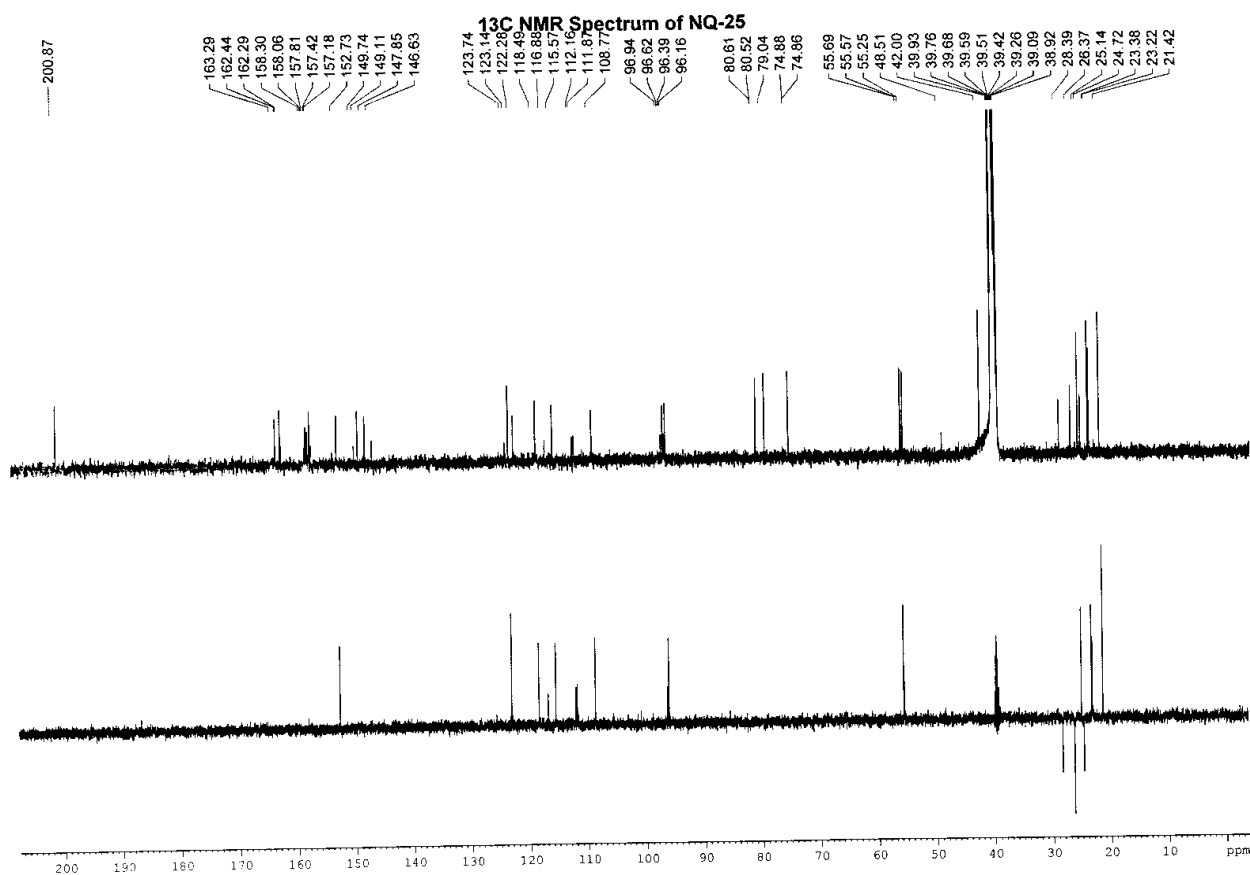

Figure S13. HSQC spectrum of 2.

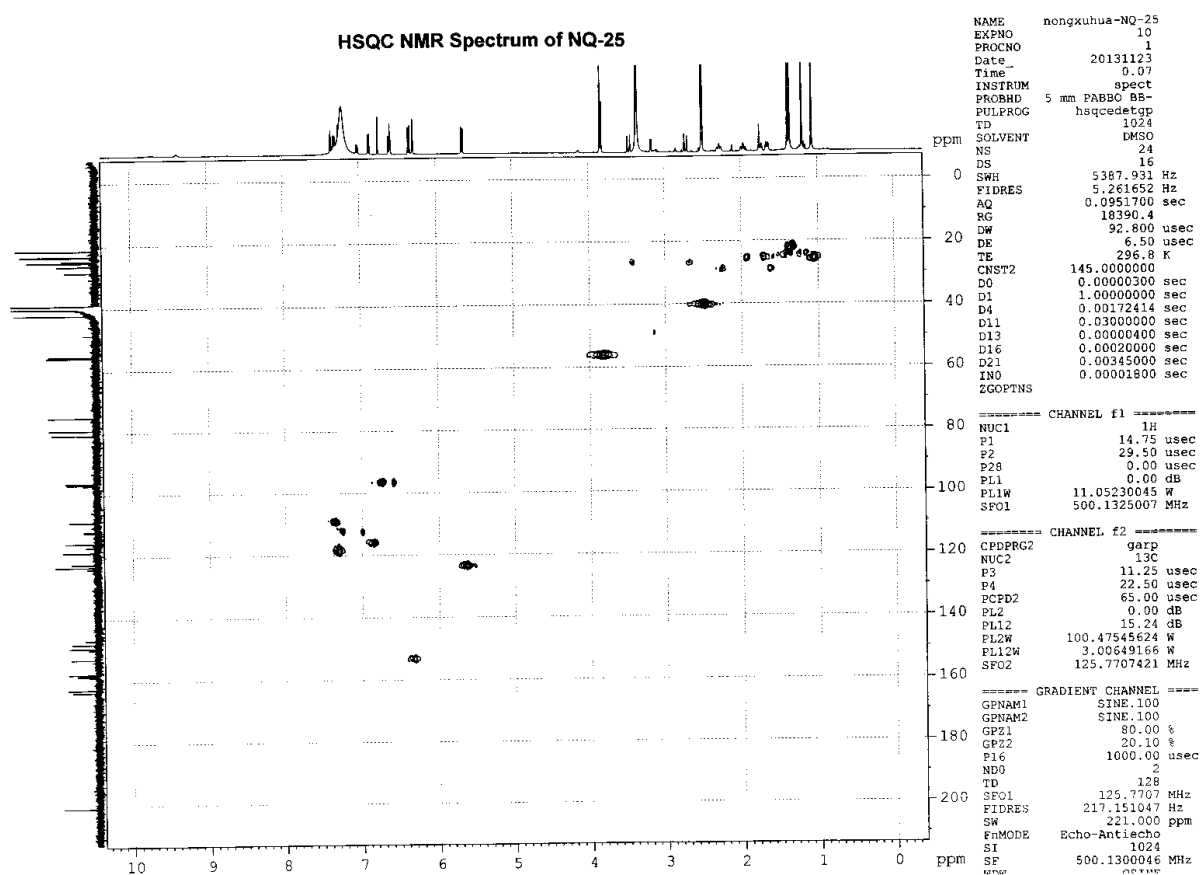

Figure S14. HMBC spectrum of 2.

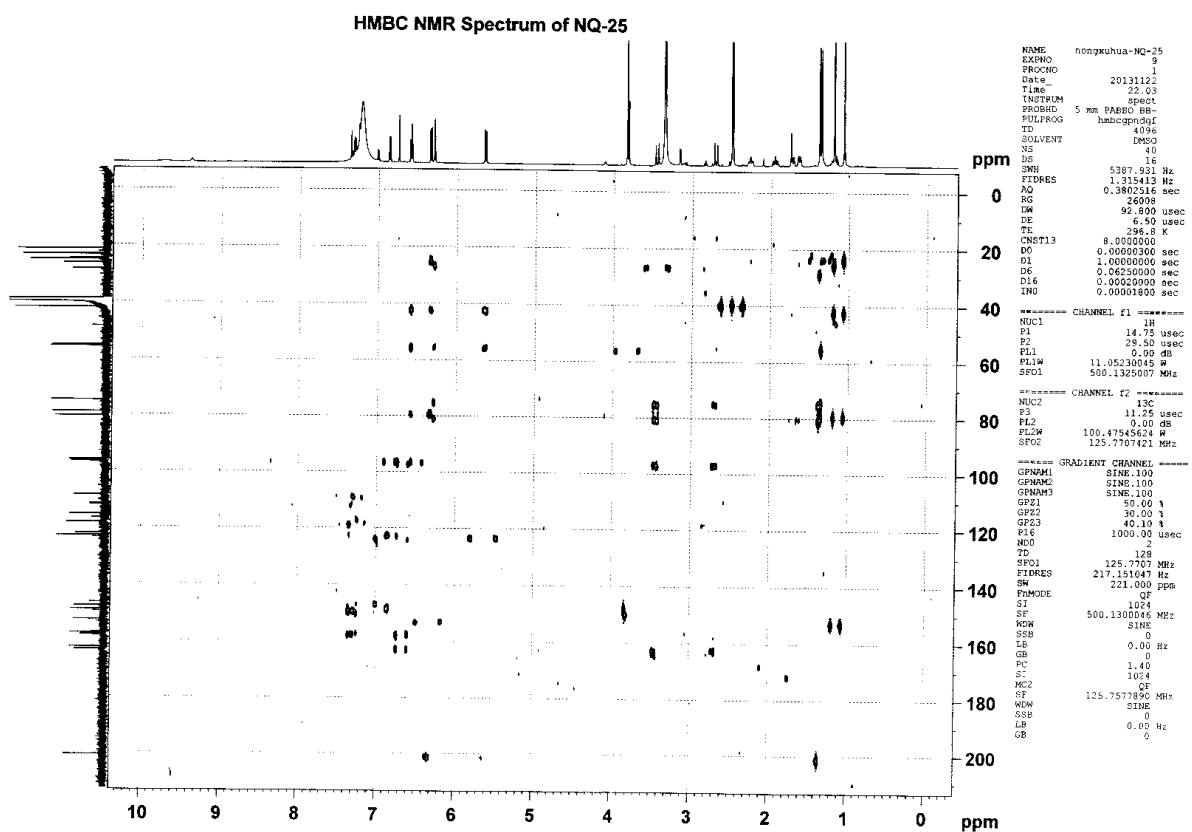

Figure S15.  $^1\text{H}$ - $^1\text{H}$  COSY spectrum of 2.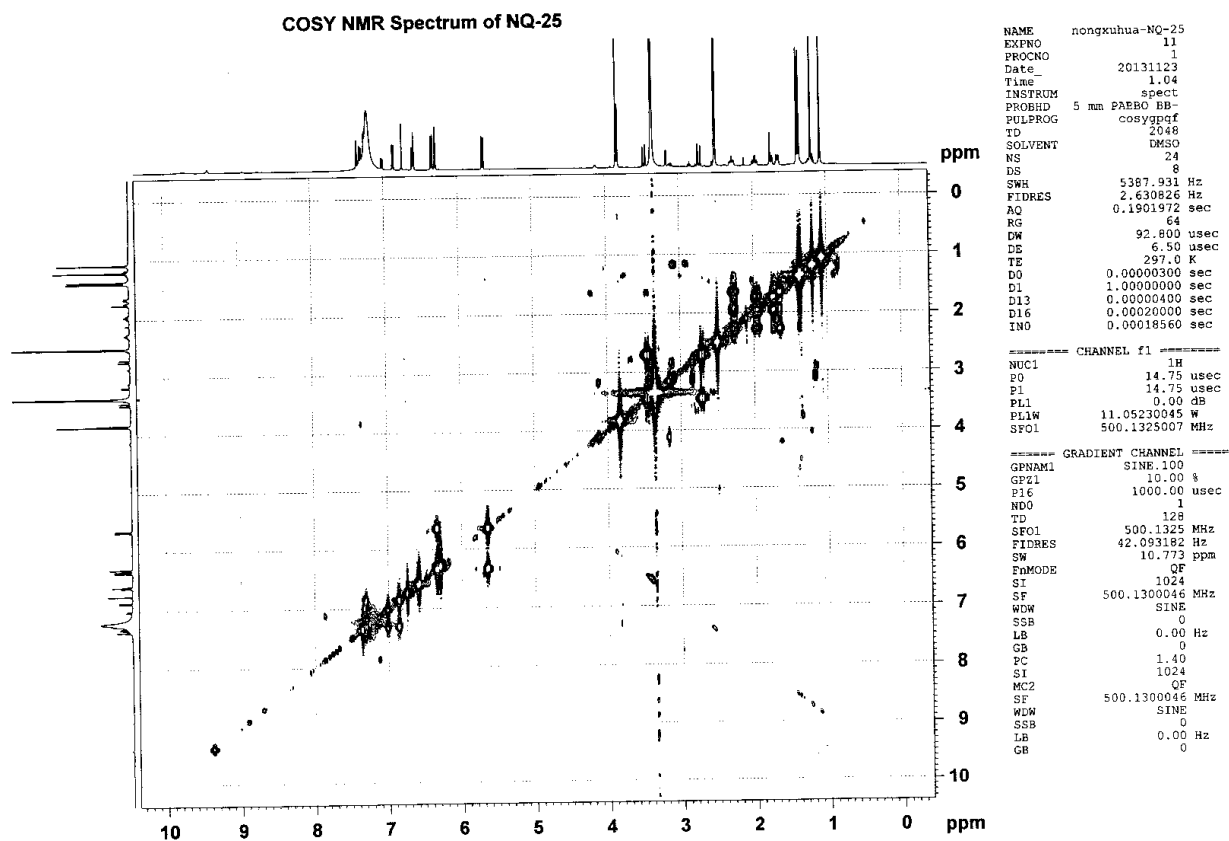

Figure S16. NOE spectrum of 2.

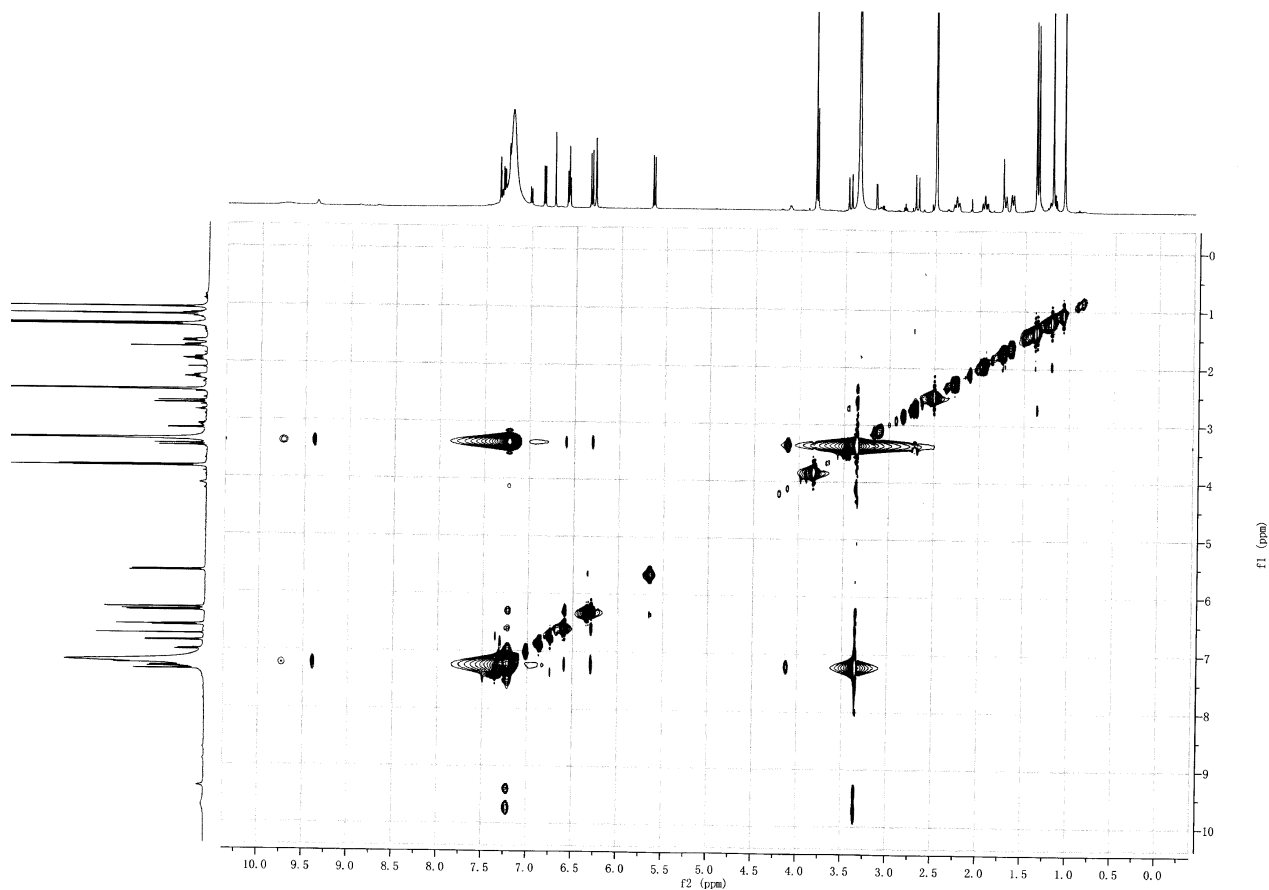

Figure S17. HR-ESIMS spectrum of 2.

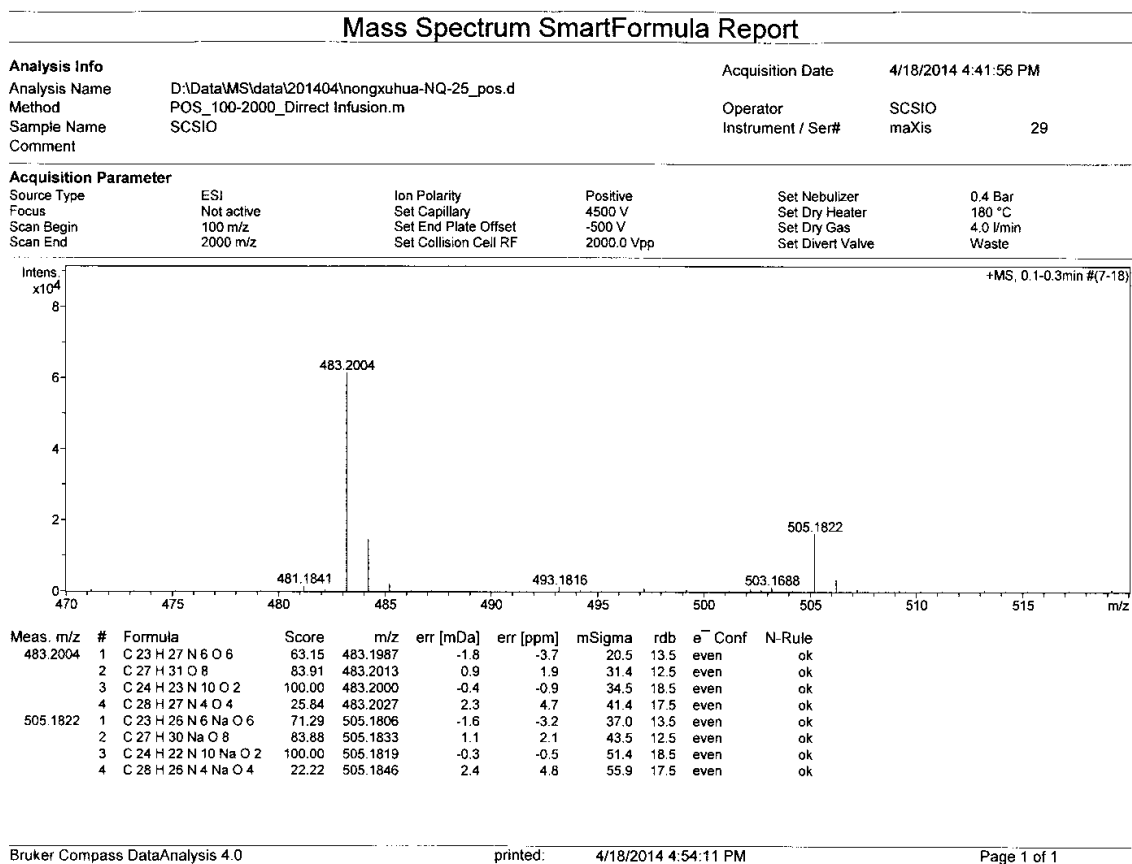

Figure S18. IR spectrum of 2.

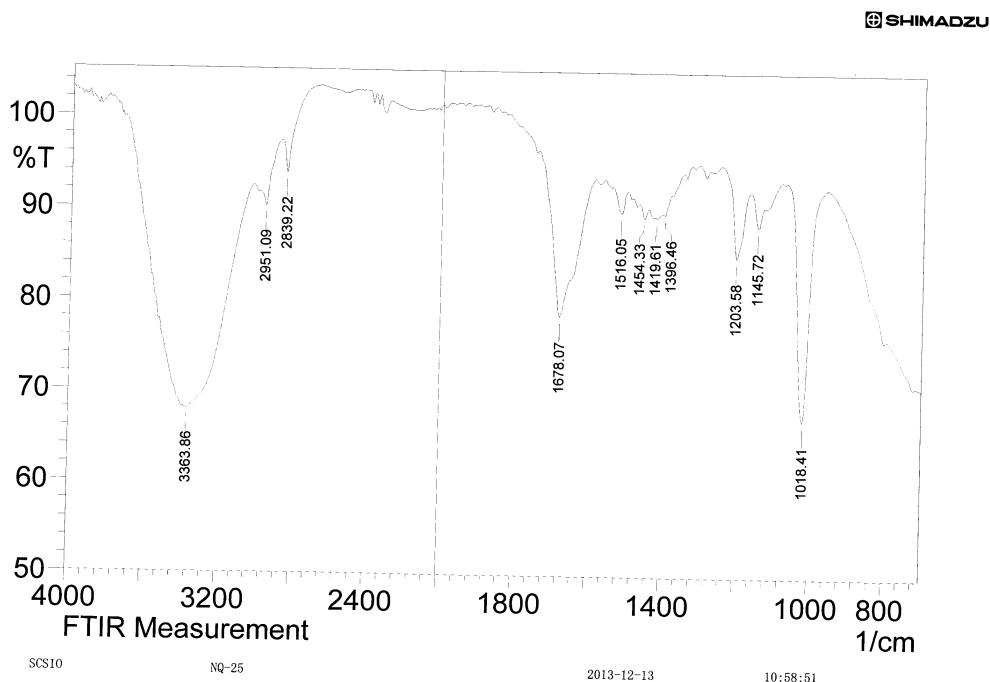

Figure S19.  $^1\text{H}$  NMR spectrum of 3.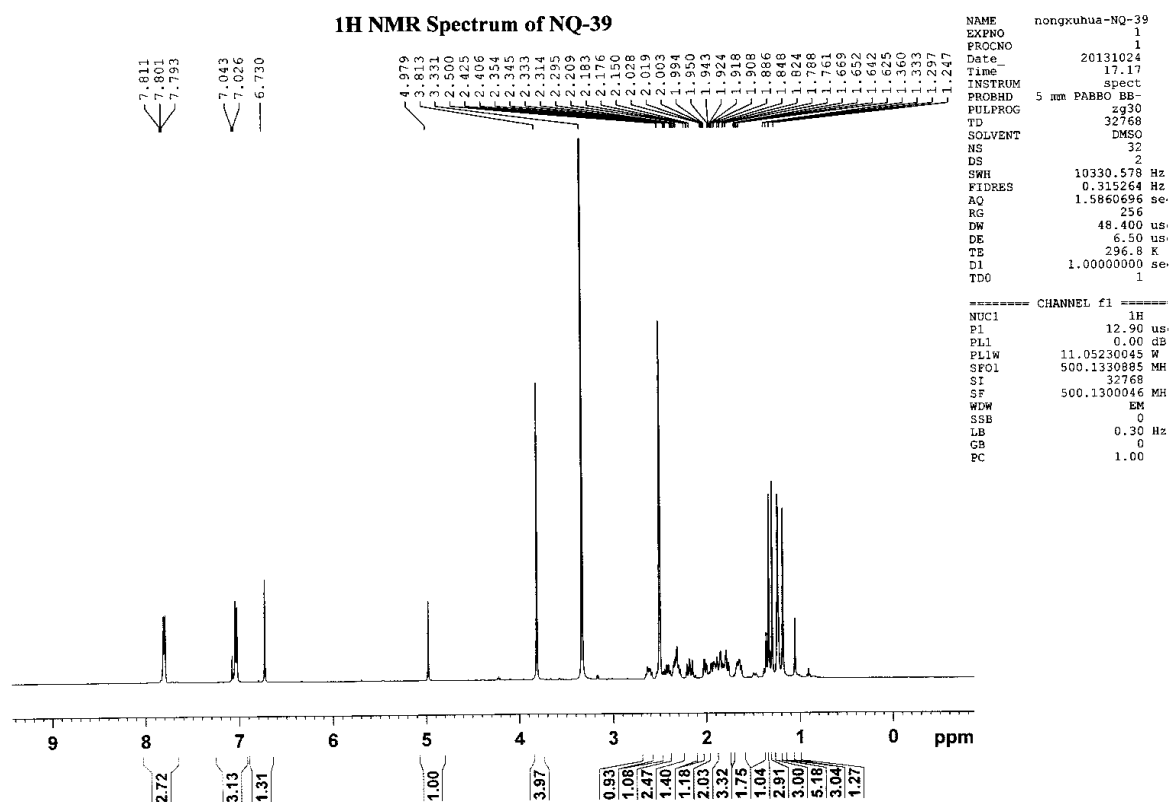Figure S20.  $^{13}\text{C}$  NMR and DEPT135 spectrum of 3.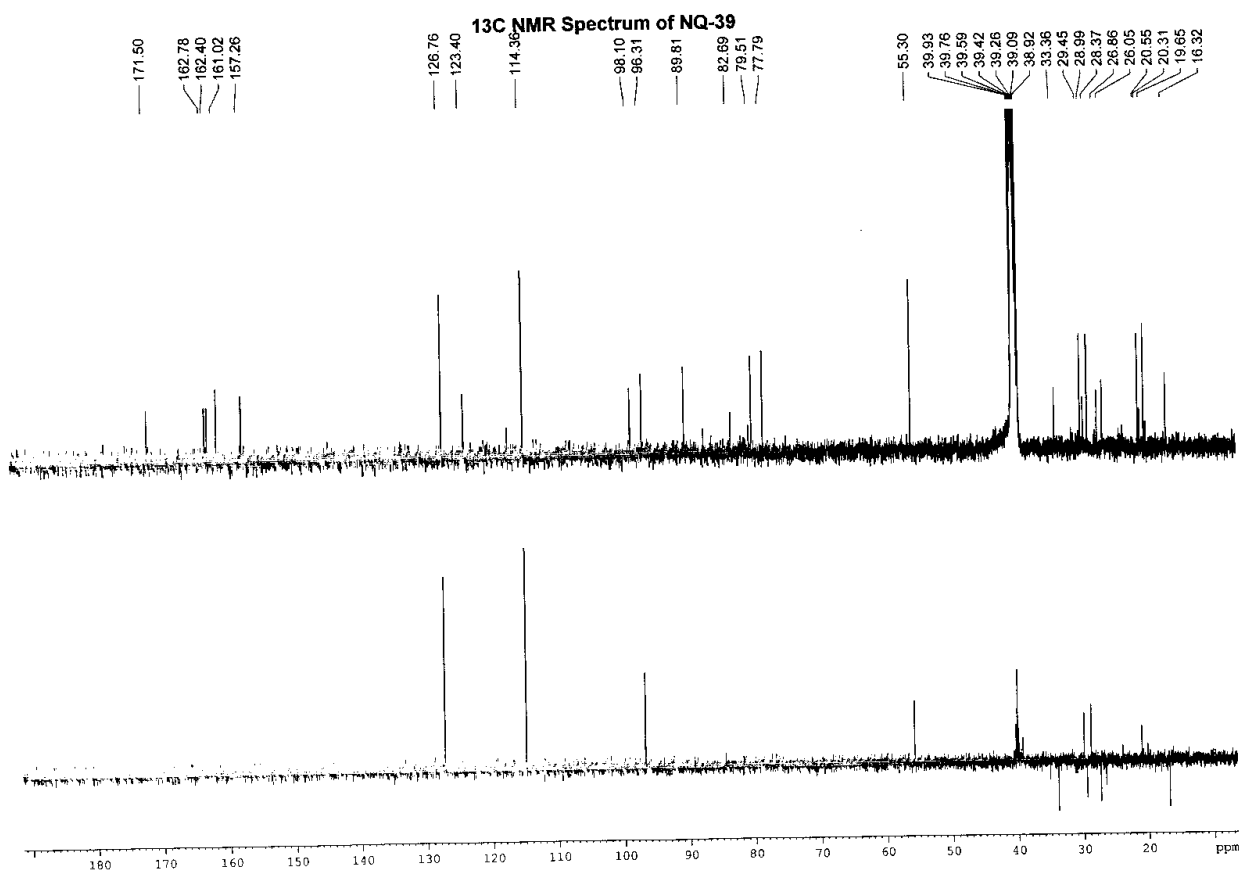

Figure S21. HSQC spectrum of 3.

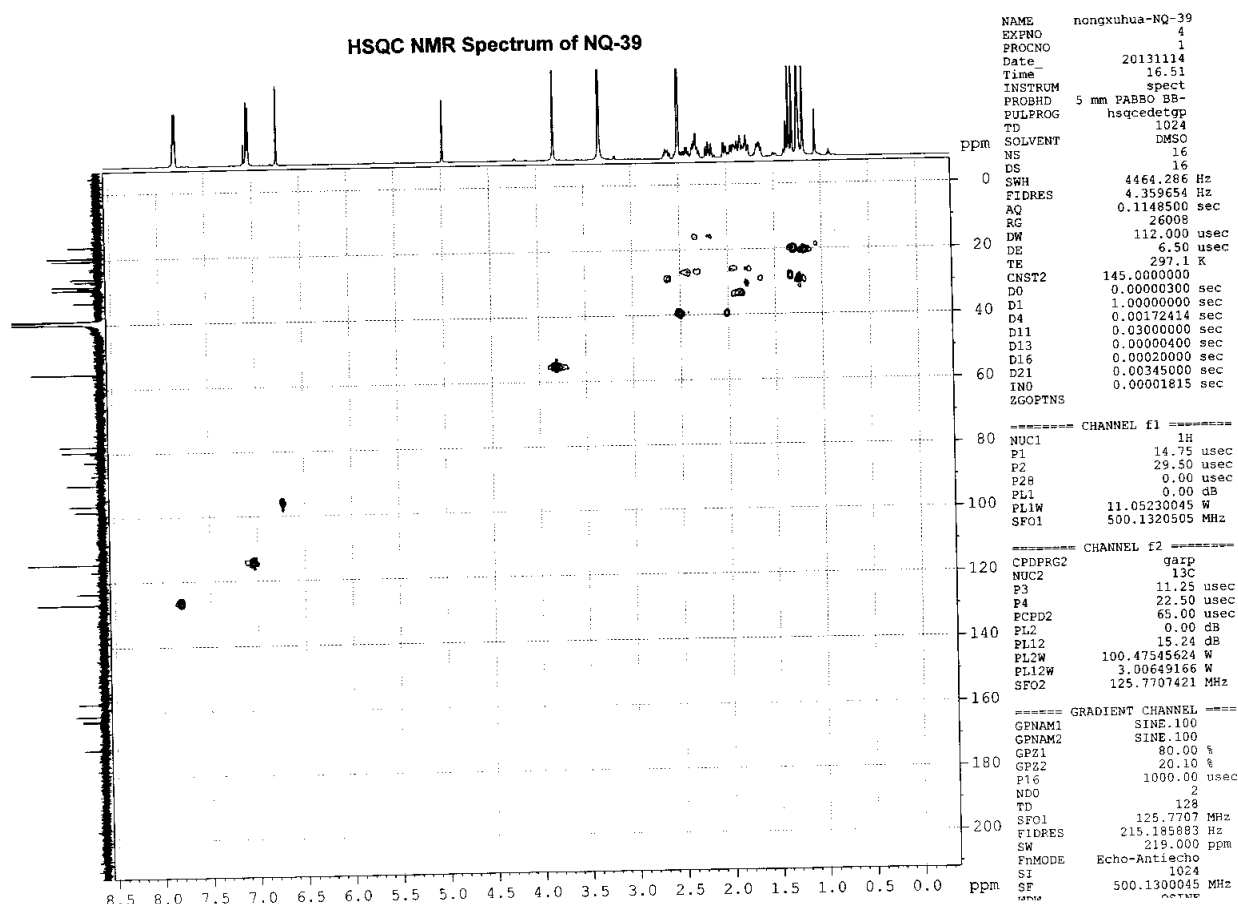

Figure S22. HMBC spectrum of 3.

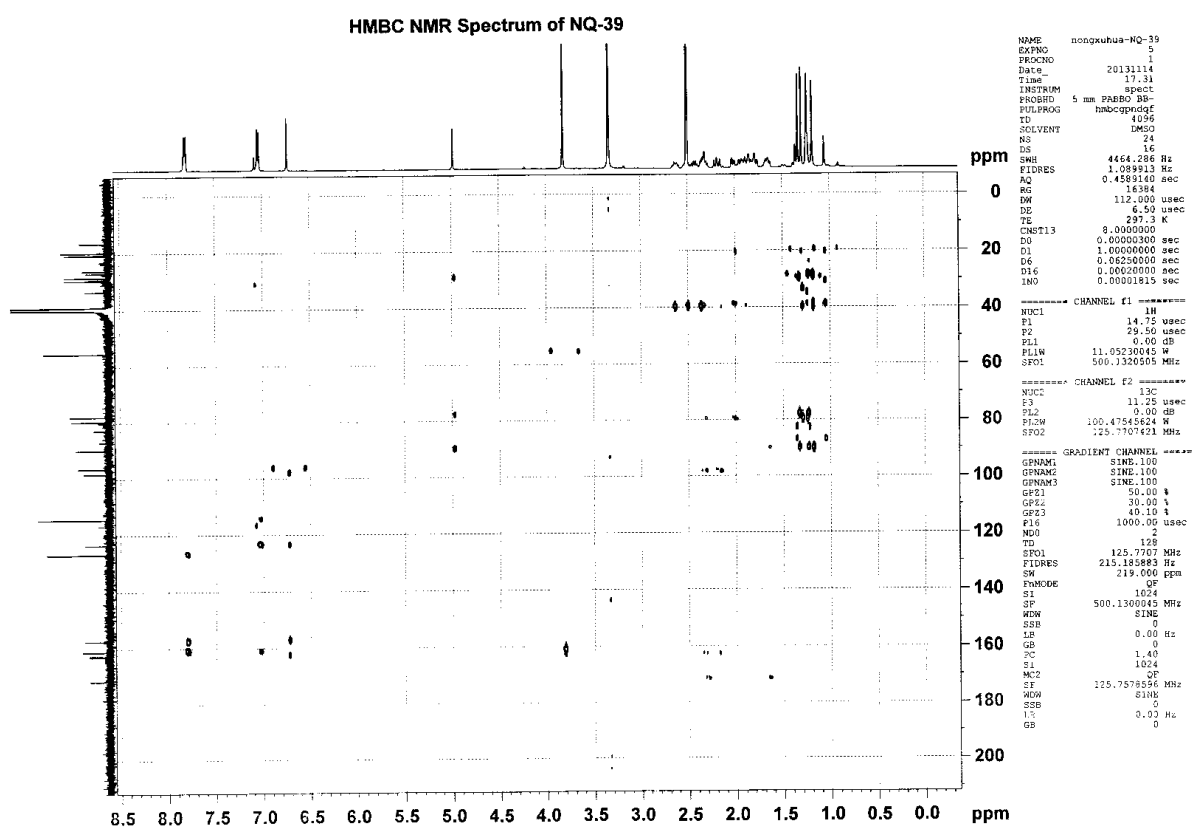

Figure S23.  $^1\text{H}$ - $^1\text{H}$  COSY spectrum of 3.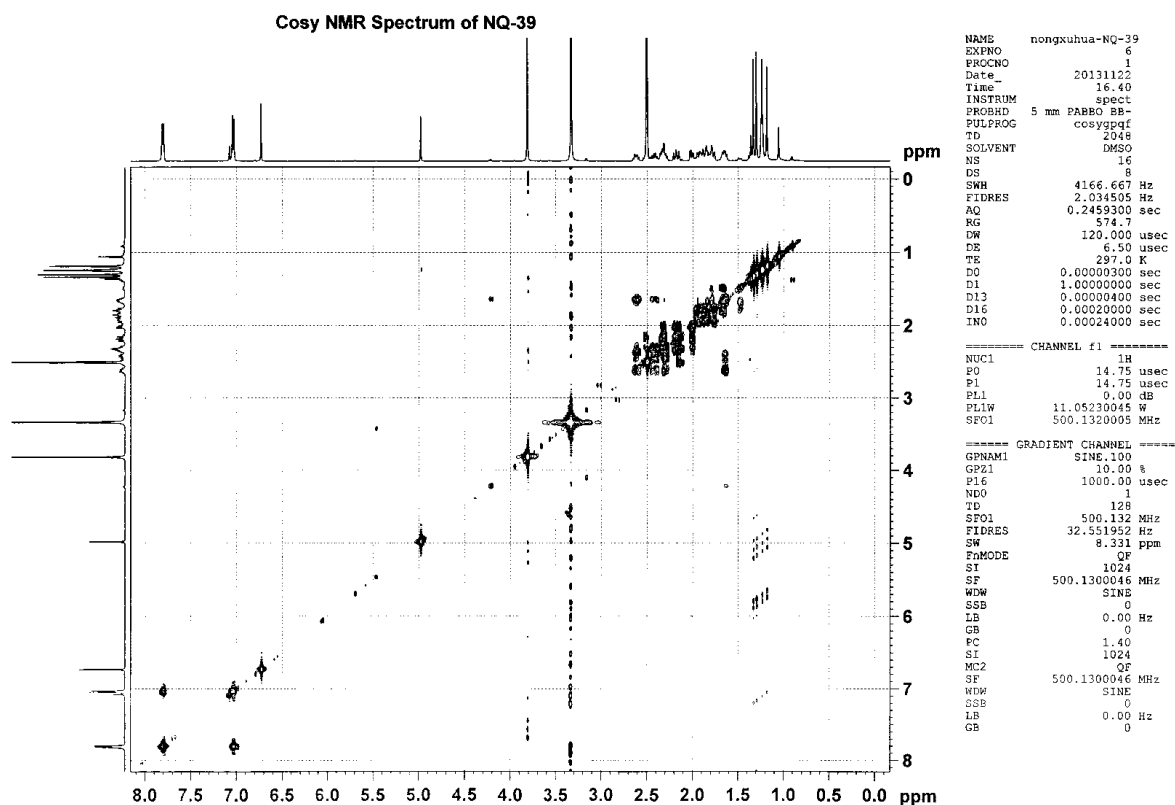

Figure S24. NOESY spectrum of 3.

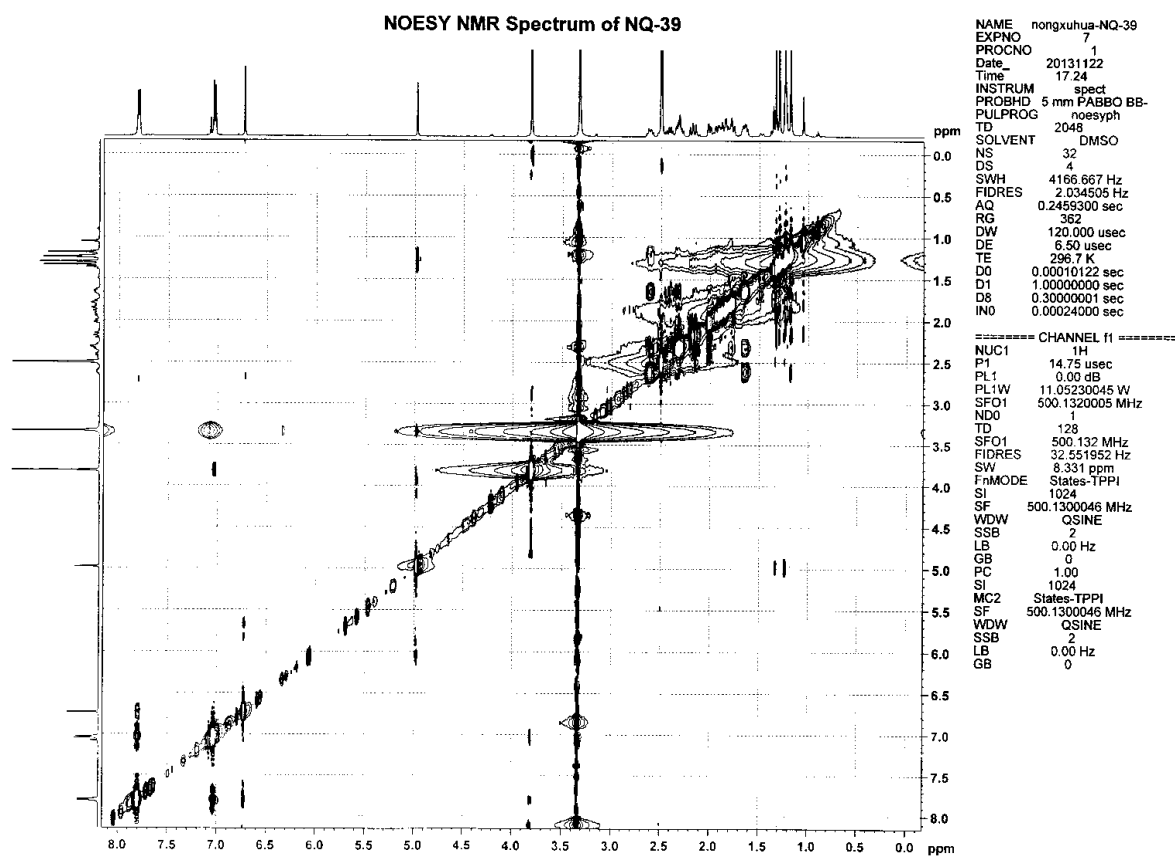

Figure S25. HR-ESIMS spectrum of 3.

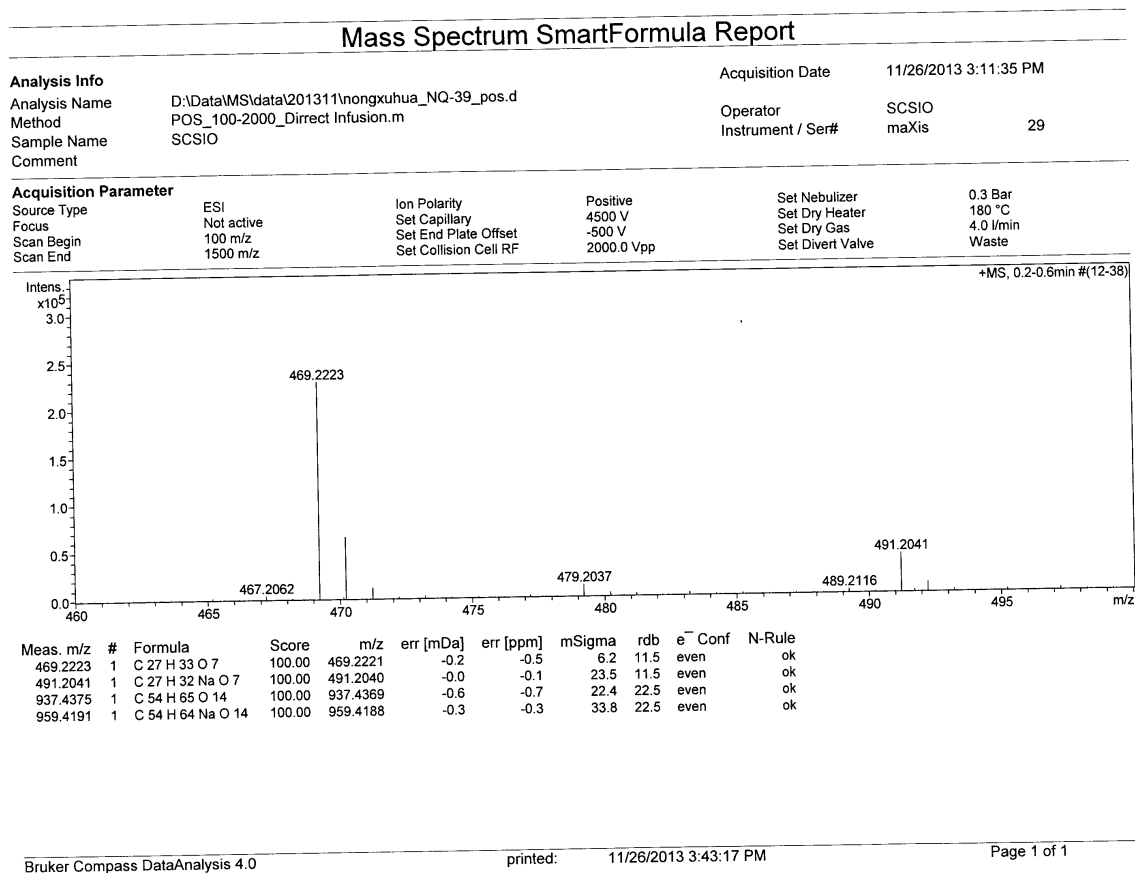

Figure S26. IR spectrum of 3.

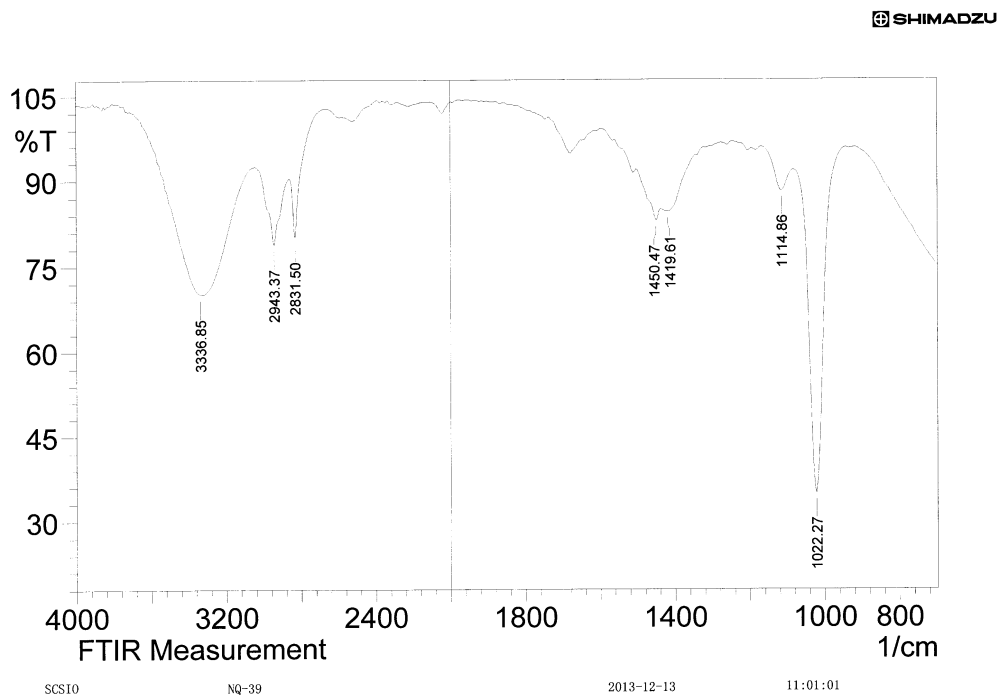

Figure S27.  $^1\text{H}$  NMR spectrum of 9.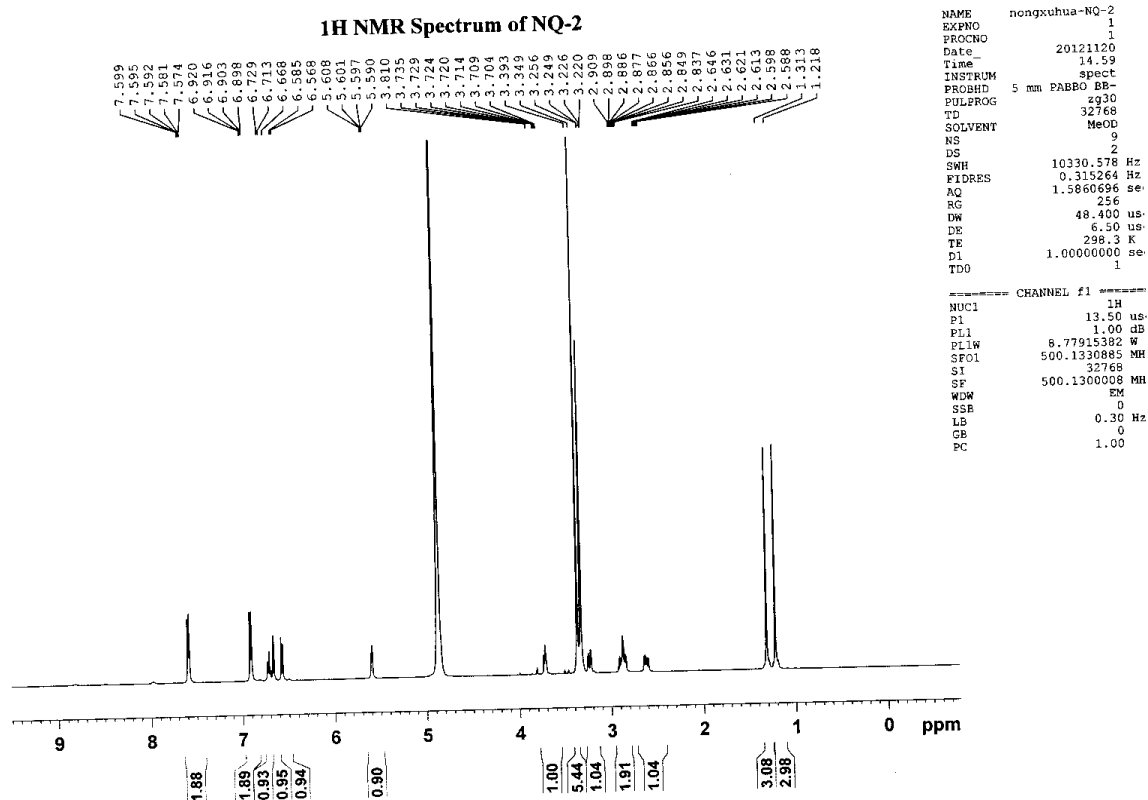Figure S28.  $^{13}\text{C}$  NMR spectrum of 9.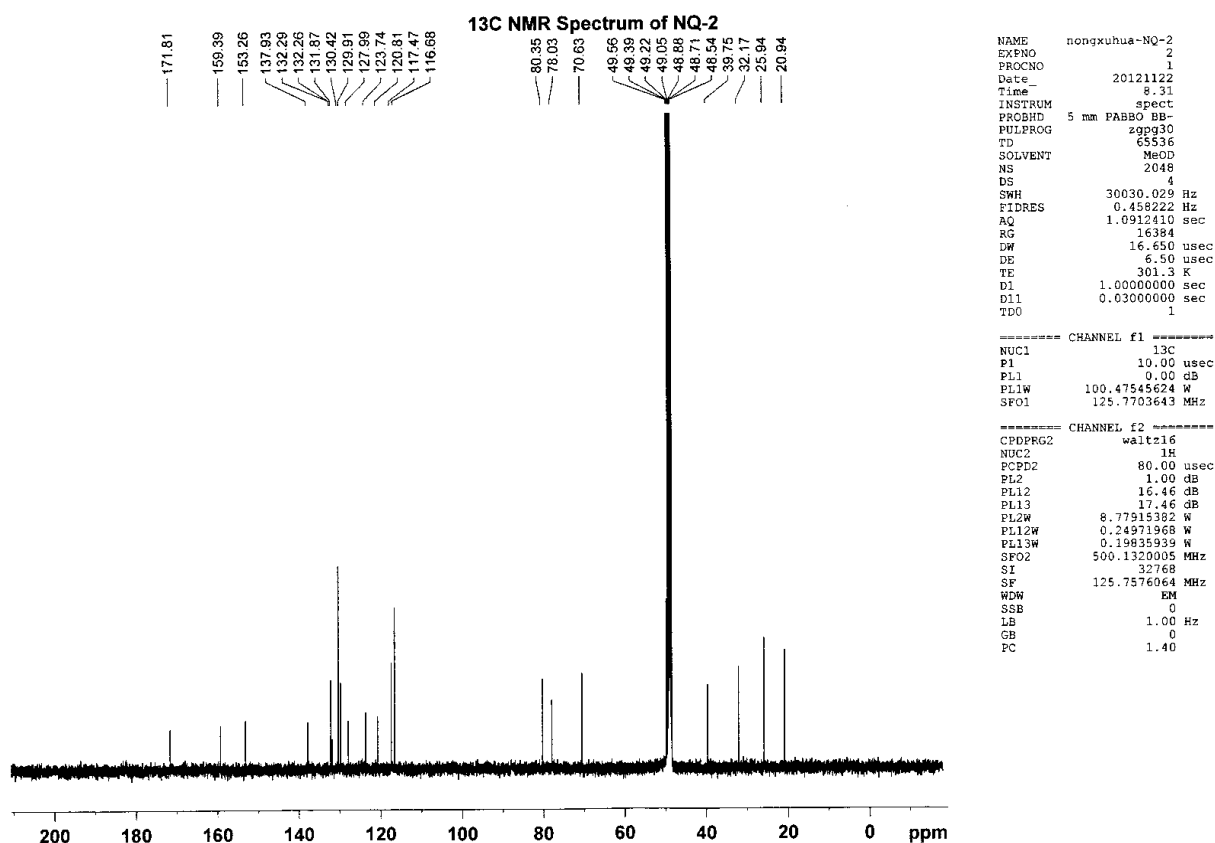

Figure S29. HSQC spectrum of 9.

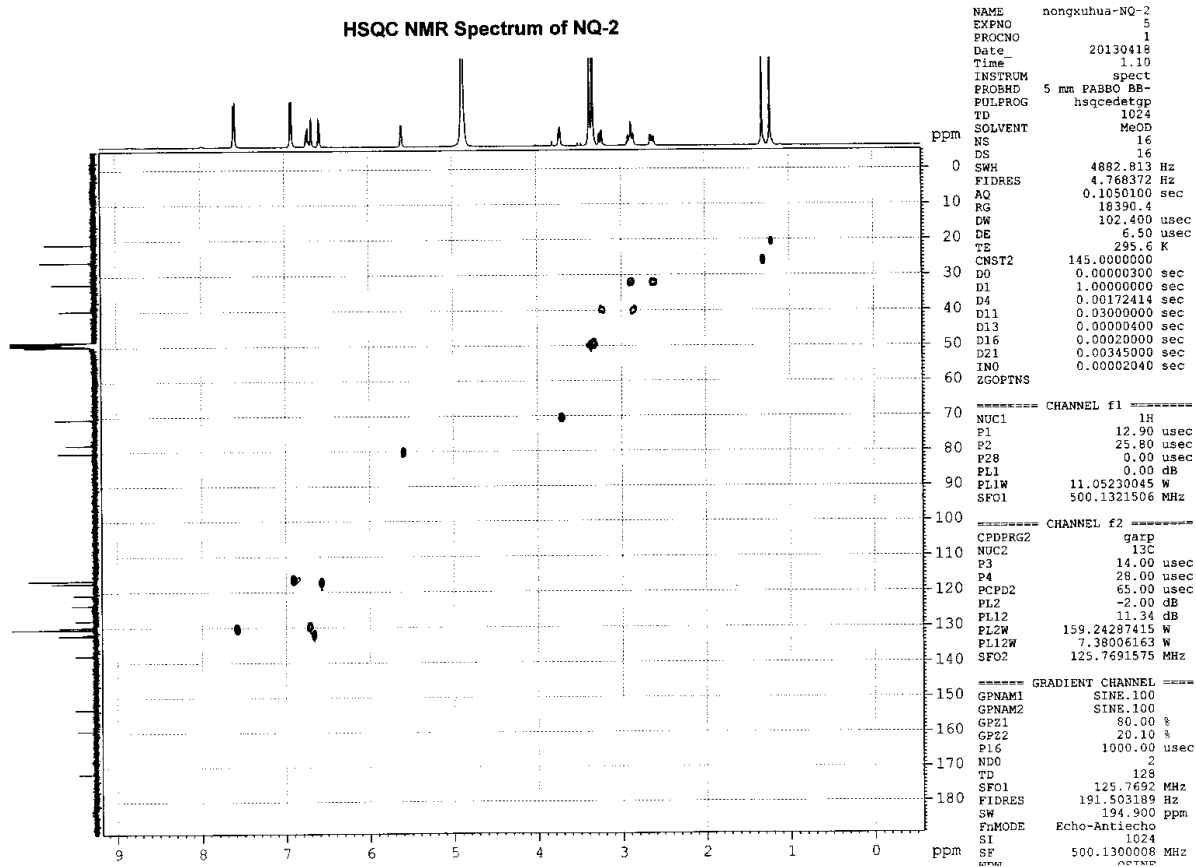

Figure S30. HR-ESIMS spectrum of 9.

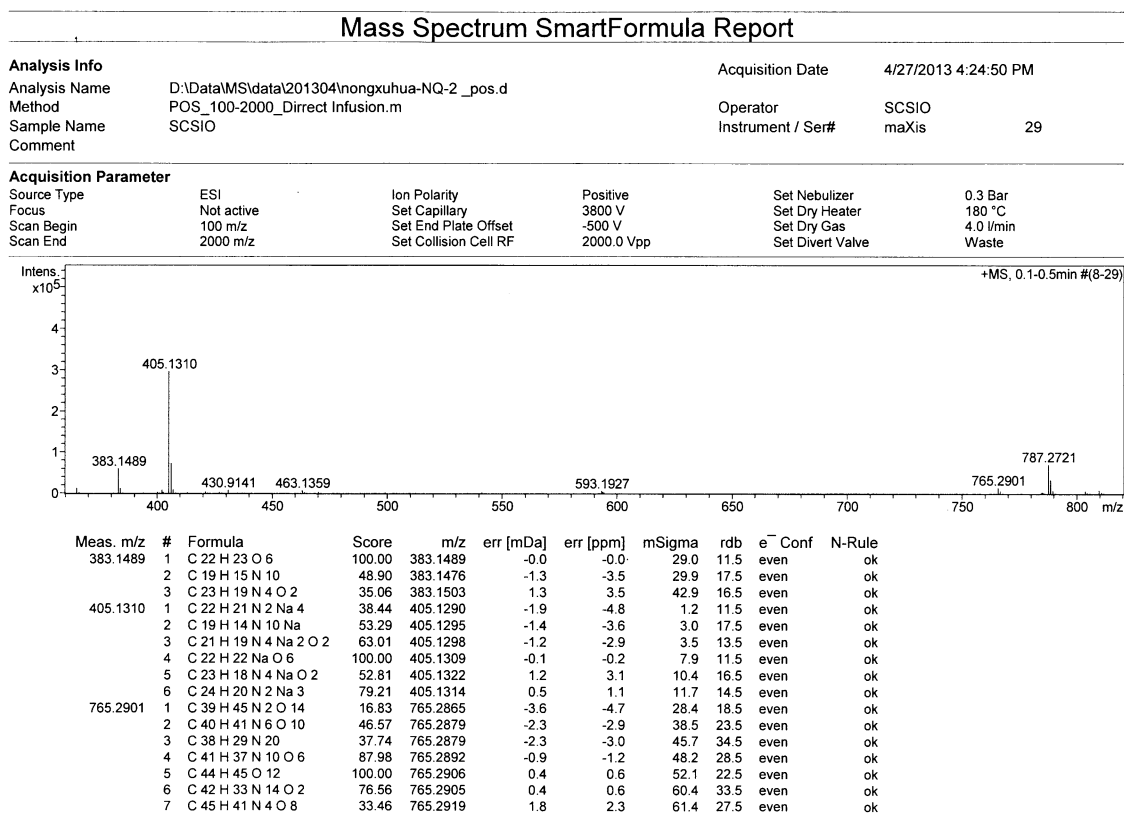

Figure S31. IR spectrum of 9.

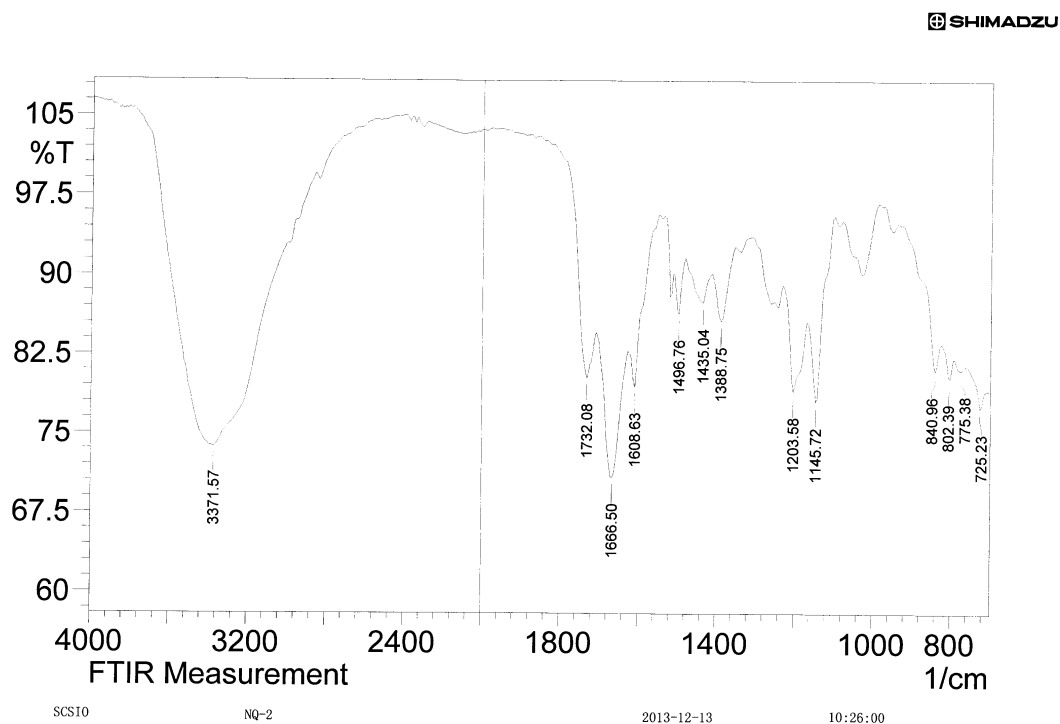Figure S32. <sup>1</sup>H-NMR spectrum of 10.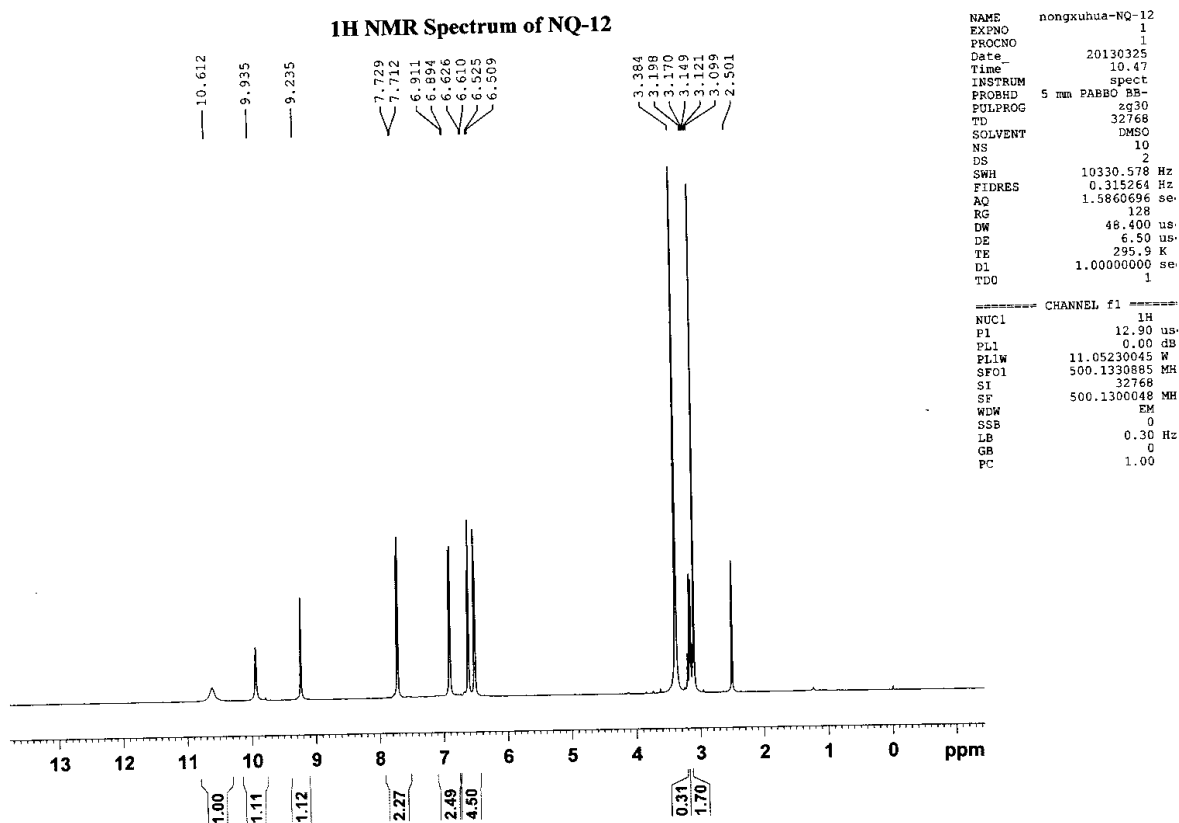

Figure S33.  $^{13}\text{C}$  NMR and DEPT135 spectra of 10.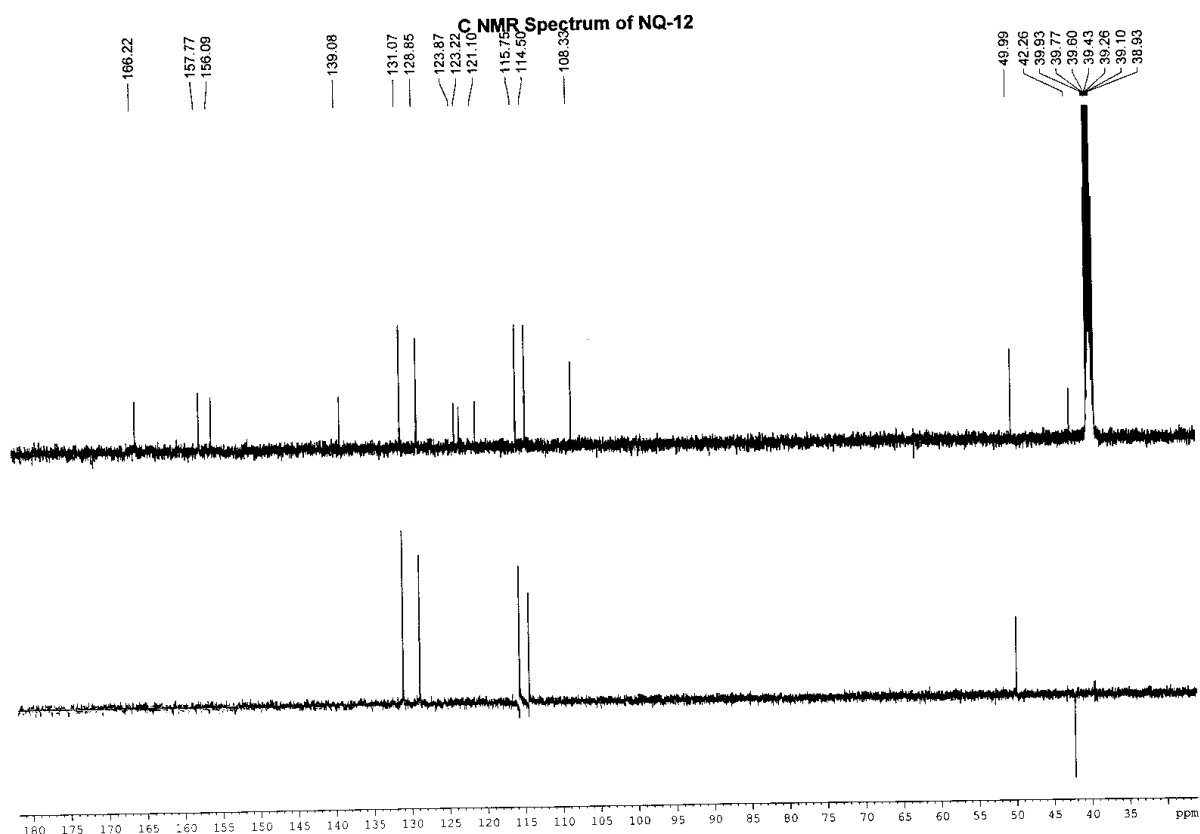

Figure S34. HSQC spectrum of 10.

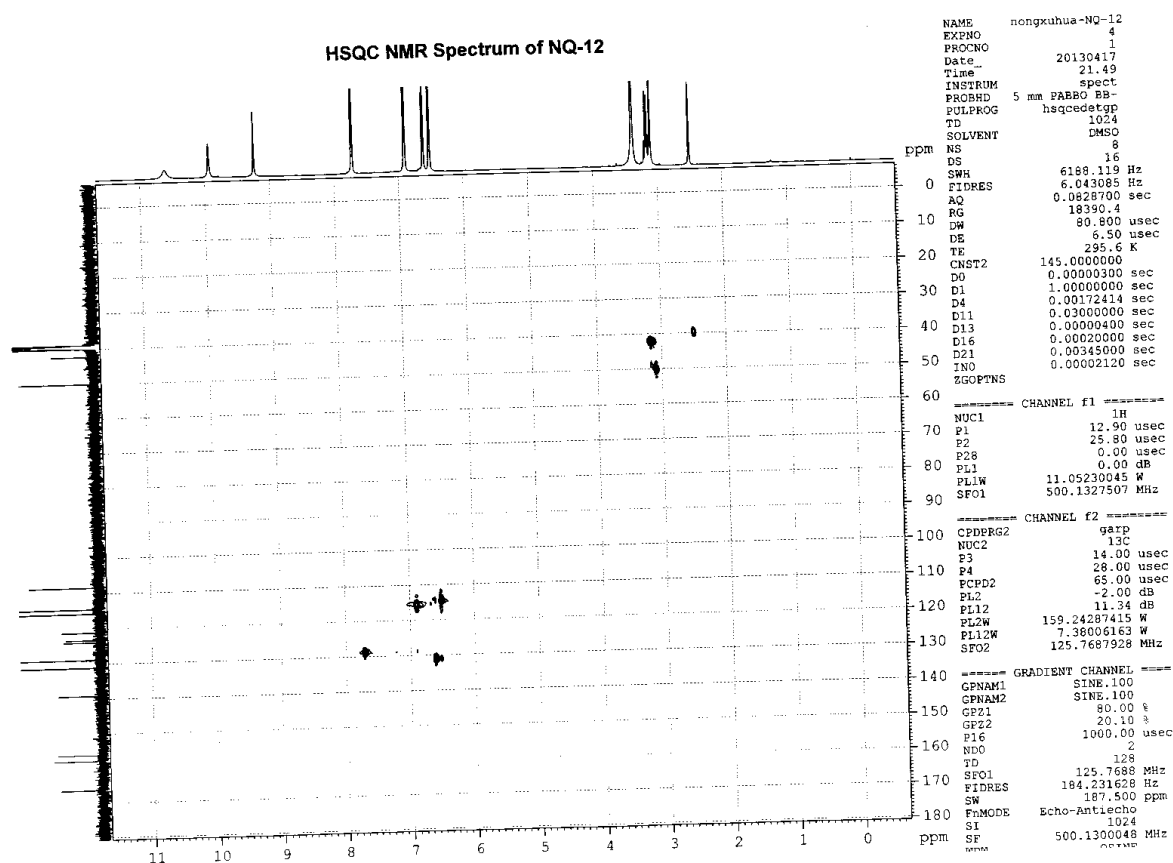

Figure S35. HMBC spectrum of 10.

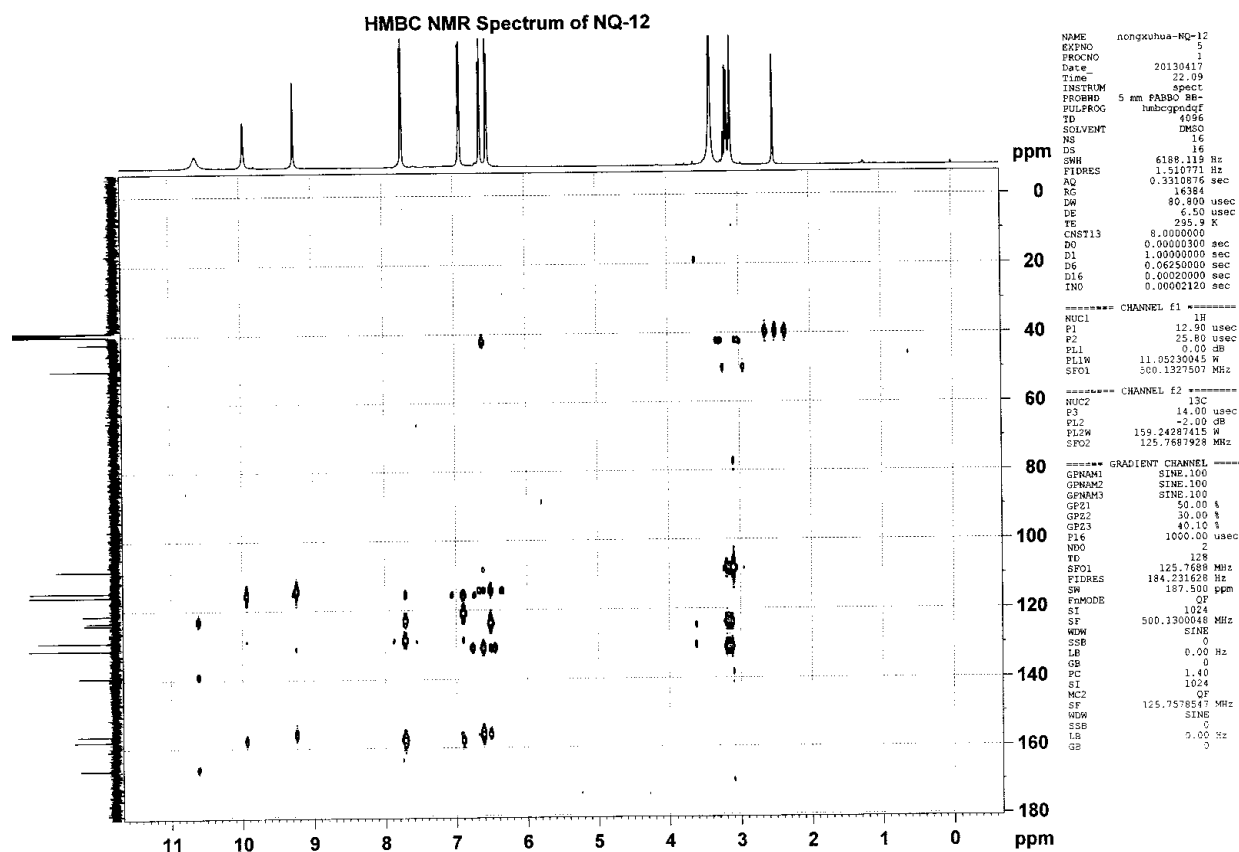Figure S36.  $^1\text{H}$ - $^1\text{H}$  COSY spectrum of 10.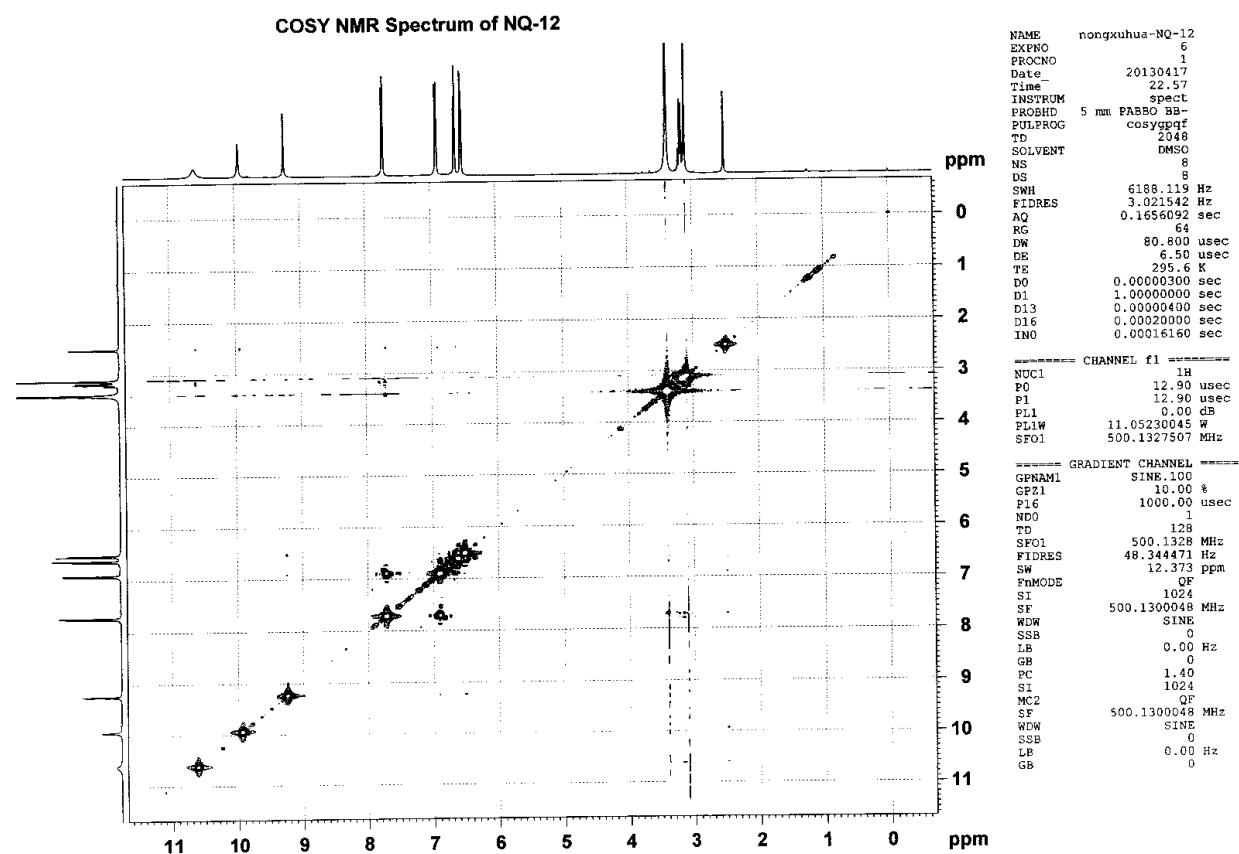

Figure S37. HR-ESIMS spectrum of 10.

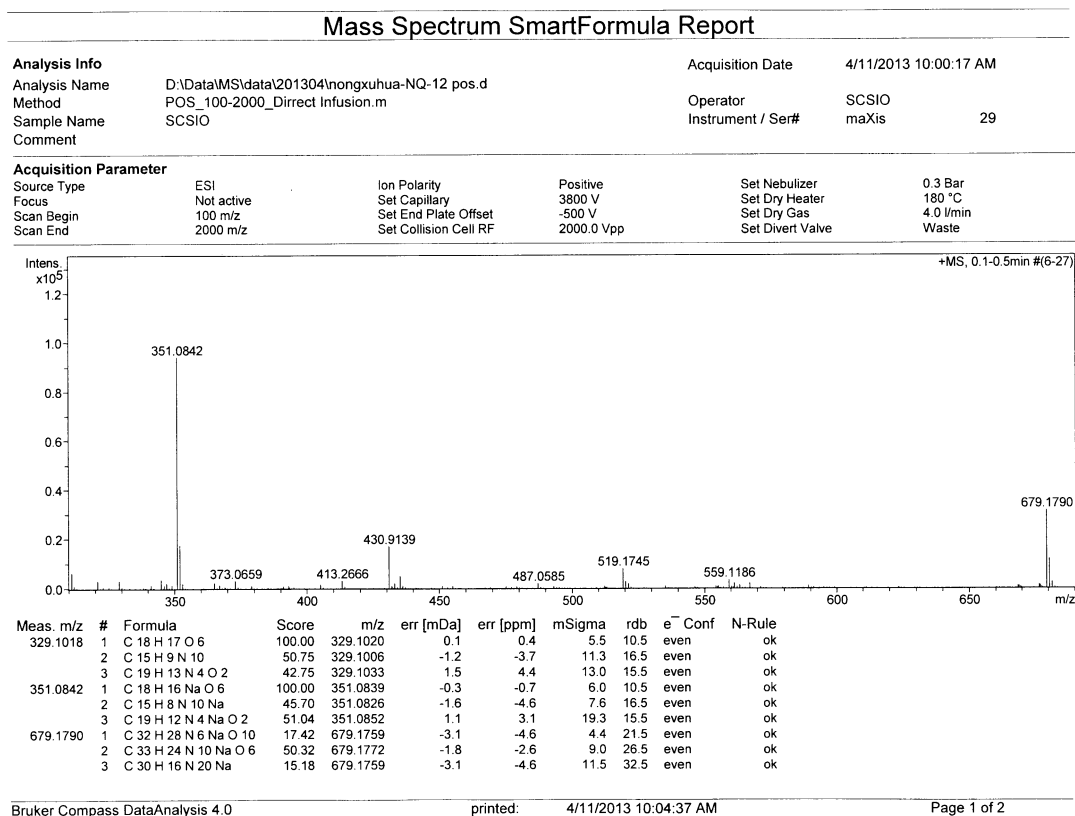

Figure S38. IR spectrum of 10.

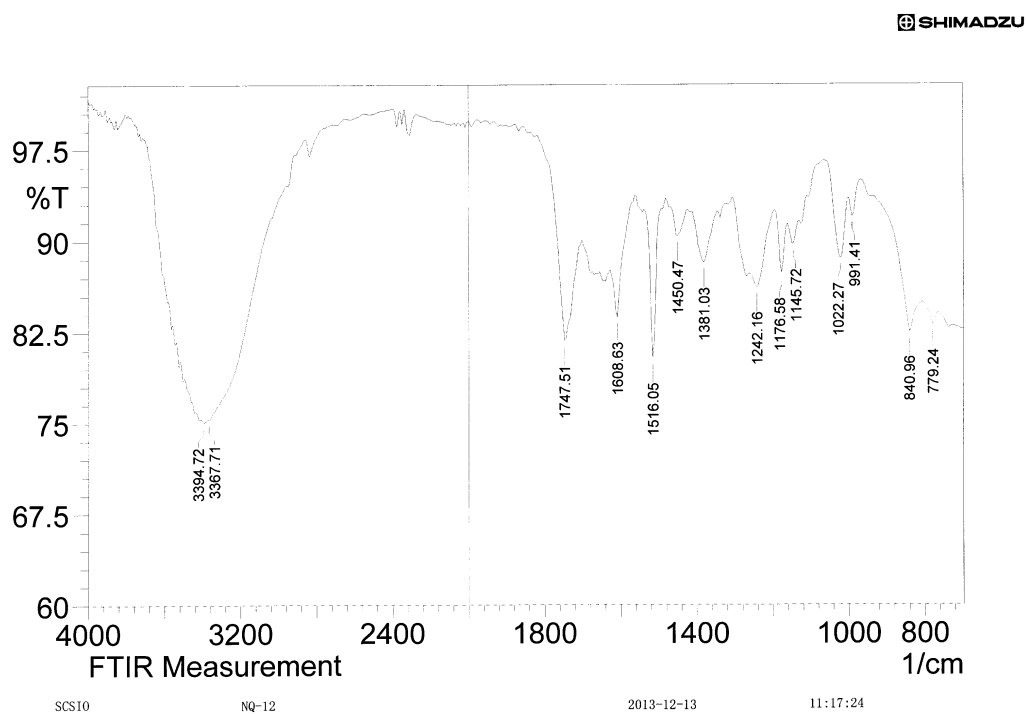

**Figure S39.** Comparison of the experimental CD spectra of 9, 11, 12 and 4-(4-hydroxyphenyl)-5-(4-hydroxyphenylmethyl)-2-hydroxyfurane-2-one (18).

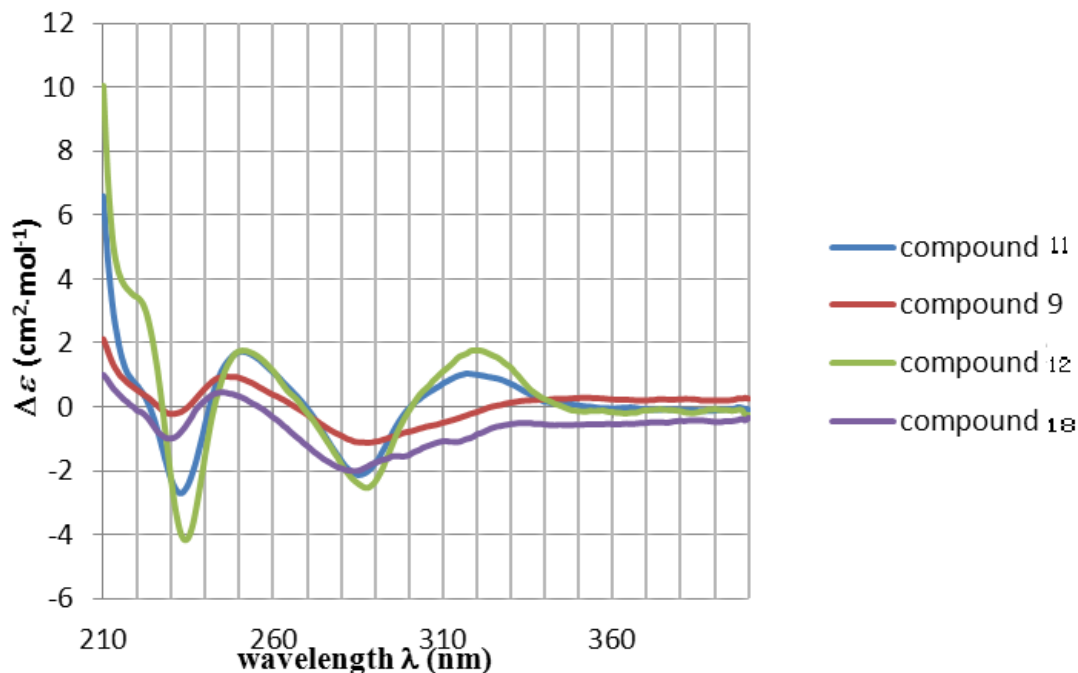

### S1. Isolation and Purification of Compounds 1–17

The extract was subjected to silica gel CC using gradient elution with a  $\text{CHCl}_3/\text{CH}_3\text{OH}$  solvent system at the ratios of 100:0, 98:2, 95:5, 90:10, 80:20, 50:50, and 0:100 (v/v) to give eight fractions (Fr.1–Fr.8). Fr.1 (3.9 g) was subjected to a silica gel CC eluting with  $\text{CHCl}_3/\text{CH}_3\text{COCH}_3$  at the ratios of 90:10, 80:20, 70:30, 50:50, 100:0 (v/v), to offer Fr.1-1~8. Subfraction Fr.1-2 was isolated by MPLC with an ODS column, eluting with  $\text{CH}_3\text{CN}-\text{H}_2\text{O}$  (from 10:90 to 100:0, 90 min, 20 mL/min) to give Fr.1-2-1~6. Subfraction Fr.1-2-5 was purified by SP-RP HPLC, eluting with  $\text{CH}_3\text{CN}/\text{H}_2\text{O}$  (37:53), to obtain **13** ( $t_R = 55$  min, 15 mg). Subfraction Fr.1-2-6 was purified by SP-RP HPLC, eluting with  $\text{CH}_3\text{CN}/\text{H}_2\text{O}$  (65:35), to obtain **6** ( $t_R = 77$  min, 2 mg). Subfraction Fr.1-3 was purified by SP-RP HPLC, eluting with  $\text{CH}_3\text{OH}/\text{H}_2\text{O}$  (60:40), to obtain **12** ( $t_R = 70$  min, 15 mg), **4** ( $t_R = 53$  min, 15 mg). Subfraction Fr.1-5 was purified by SP-RP HPLC, eluting with  $\text{CH}_3\text{OH}/\text{H}_2\text{O}$  (55:45), to obtain **17** ( $t_R = 30$  min, 3 mg), **7** ( $t_R = 60$  min, 4 mg). Subfraction Fr.1-6 was isolated by MPLC with an ODS column, eluting with  $\text{CH}_3\text{CN}-\text{H}_2\text{O}$  (from 10:90 to 100:0, 60 min, 20 mL/min) to give Fr.1-6-1~4. Fr.1-6-3 was purified by SP-RP HPLC, eluting with  $\text{CH}_3\text{OH}/\text{H}_2\text{O}$  (70:30), to obtain **8** ( $t_R = 33$  min, 2 mg), **3** ( $t_R = 41$  min, 4 mg). Subfraction Fr.1-7 was isolated by MPLC with an ODS column, eluting with  $\text{CH}_3\text{CN}-\text{H}_2\text{O}$  (from 10:90 to 100:0, 60 min, 20 mL/min) to give Fr.1-7-1~4. And subfraction Fr.1-7-2 was purified by SP-RP HPLC, eluting with  $\text{CH}_3\text{CN}/\text{H}_2\text{O}$  (45:55), to obtain **1** ( $t_R = 36$  min, 3 mg), **5** ( $t_R = 45$  min, 6 mg), **2** ( $t_R = 47$  min, 4 mg). Fr.2 (11 g) was subjected to a silica gel CC eluting with  $\text{CHCl}_3/\text{CH}_3\text{COCH}_3$  at the ratios of 90:10, 80:20, 70:30, 50:50, 100:0 (v/v), to offer Fr.2-1~6. Subfraction Fr.2-2 was separated by MPLC with an ODS column, eluting with  $\text{CH}_3\text{OH}-\text{H}_2\text{O}$  (from 10:90 to 100:0, 60 min, 20 mL/min) to give Fr.2-2-1~3. And subfraction Fr.2-2-1 was purified by SP-RP HPLC, eluting with  $\text{CH}_3\text{CN}/\text{H}_2\text{O}$  (57:43), to obtain **14** ( $t_R = 30$  min, 10 mg). Fr.4 (1.45 g) was isolated by MPLC with an ODS column, eluting with  $\text{CH}_3\text{OH}-\text{H}_2\text{O}$  (from 15:85 to 100:0, 90 min, 20 mL/min) to give Fr.4-1~5. Fr.4-5 was

purified by SP-RP HPLC, eluting with CH<sub>3</sub>CN/H<sub>2</sub>O (46:54), to afford **11** (*t<sub>R</sub>* = 23 min, 30 mg) and **9** (*t<sub>R</sub>* = 19.0 min, 4 mg). Fr.5 (1.2 g) was isolated by MPLC with an ODS column, eluting with CH<sub>3</sub>OH-H<sub>2</sub>O (from 15:85 to 100:0, 90min, 20 mL/min) to give Fr.5-1~5. Subfraction Fr.5-3 was purified by SP-RP HPLC, eluting with CH<sub>3</sub>OH/H<sub>2</sub>O (55:45), to obtain **10** (*t<sub>R</sub>* = 39 min, 8 mg). Fr.7 (3 g) was subjected to Sephadex LH-20 CC eluting with CH<sub>3</sub>OH to collect Fr.7-1~4. Further subfraction Fr.7-4 (1.8 g) was isolated by MPLC with an ODS column, eluting with CH<sub>3</sub>OH-H<sub>2</sub>O (from 15:85 to 100:0, 90 min, 20 mL/min) to give Fr.7-4-1~4. And then subfraction Fr.7-4-4 was purified by SP-RP HPLC, eluting with CH<sub>3</sub>OH/H<sub>2</sub>O (63:37), to obtain **15** (*t<sub>R</sub>* = 37 min, 8 mg), **16** (*t<sub>R</sub>* = 14 min, 6 mg).

## S2. Structures of Compounds 1–17

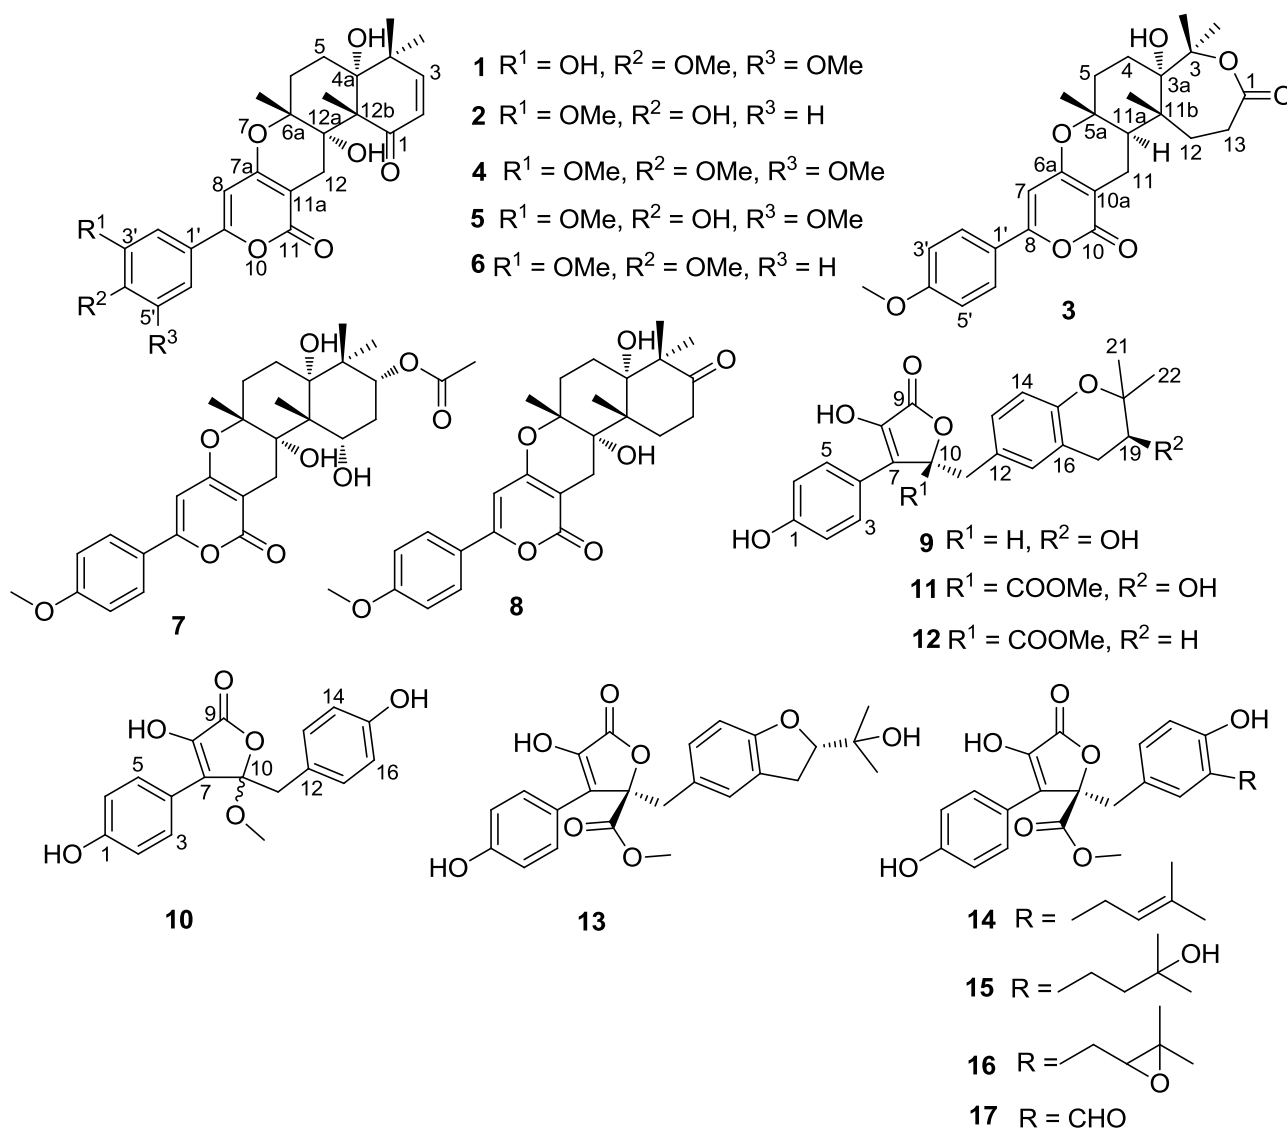

Supplement: Supplementary File 1 [file marinedrugs-12-06113-s001.pdf]
